# Supplementary material for: A novel and widespread class of ketosynthase is responsible for the head-to-head condensation of two acyl moieties in bacterial pyrone biosynthesis
Source: PubMed Central journal article supplement (PMC4578411; doi:10.3762/bjoc.11.152), 2015-08-12

# Supporting Information

for

## **A novel and widespread class of ketosynthase is responsible for the head-to-head condensation of two acyl moieties in bacterial pyrone biosynthesis**

Darko Kresovic<sup>1</sup>, Florence Schempp<sup>1</sup>, Zakaria Cheikh-Ali<sup>1</sup> and Helge B. Bode<sup>\*1,2</sup>

Address: <sup>1</sup>Merck Stiftungsprofessur für Molekulare Biotechnologie, Fachbereich Biowissenschaften, Goethe Universität Frankfurt, 60438 Frankfurt am Main, Germany and <sup>2</sup>Buchmann Institute for Molecular Life Sciences (BMLS), Goethe Universität Frankfurt, 60438 Frankfurt am Main, Germany

Email: Helge B. Bode - h.bode@bio.uni-frankfurt.de

\* Corresponding author

## **Experimental procedures, details of bioinformatic analysis and NMR data of pseudopyronines**

### **Materials and methods**

**Cultivation of strains.** *E. coli* strains were cultivated in liquid or solid LB-medium (10 g/L tryptone, 5 g/L yeast extract and 10 g/L NaCl) or TB-medium (12 g/L tryptone, 24 g/L yeast extract, 4 mL/L glycerol and 0.17 M KH<sub>2</sub>PO<sub>4</sub>/0.72 M K<sub>2</sub>HPO<sub>4</sub>). For preparation of solid media, 1.5% (w/v) Agar was added. For plasmid preparation *E. coli* strains were cultivated at 37 °C in TB-medium. Kanamycin (50 µg/mL) and chloramphenicol (20 µg/mL) were used as resistant markers. For cultivation of *Pseudomonas* sp. GM30 and *Pseudomonas putida* KT2440 the same media was used but strains were grown at 30 °C.

**Construction of *ppyS* mutants.** Mutants were either constructed using the TA-cloning strategy [1] or with oligonucleotide-directed mutagenesis. Point mutations were introduced to the pCOLA\_*ppys* vector, which is used to heterologously express

PpyS in *E. coli* BL21(DE3) Star. Mutants C129A, H281A, E105A and E330A were constructed using the TA-cloning strategy, for this method a pair of oligonucleotides (v.p. fw and v.p. rev) were used to amplify the vector, containing the non-mutated gene section using the Phusion polymerase (Fermentas). After separation by agarose gel electrophoresis, the desired fragments were extracted with the GeneJET Gel Extraction Kit (Fermentas) and incubated for 30 minutes at 70 °C with Taq polymerase (Thermo Scientific), resulting in a 3' A-overhang fragment. Another pair of oligonucleotides (ds fw and ds rev), containing the mutated gene section, was used to form the 3' T-overhang fragment carrying the mutation. For ligation both fragments were incubated overnight at room temperature with T4 DNA ligase (Fermentas). The N310A and R121D PpyS mutants were created using oligonucleotide-directed mutagenesis, for which a pair of oligonucleotides was applied to amplify the vector and to introduce the point mutation using the Phusion polymerase (Fermentas) for PCR. For both strategies the ligation mixture was subsequently used to transform *E. coli* DH10B by electroporation (1250 V, 200  $\Omega$  and 25  $\mu$ F). After plasmid extraction the obtained plasmids were verified by sequencing at SeqIT GmbH (Germany, Kaiserslautern). Verified plasmids were used to transform *E. coli* BL21 (DE3) Star along with pACYC\_ *bkdABC\_ngrA* [2] by electroporation. For photopyrone biosynthesis both vectors (pCOLA\_ *ppyS* and pACYC\_ *bkdABC\_ngrA*) are induced with 0.01 mM isopropyl- $\beta$ -D-thiogalactopyranoside (IPTG) (Fermentas) for expression in *E. coli* BL21 (DE3) Star.

**Cloning of pseudopyronine synthase (*pyrS*).** We first constructed pCOLA\_ *pyrS* for heterologous expression in *E. coli* BL21 (DE3) Star. Therefore *pyrS* was cloned from extracted *Pseudomonas* sp. GM30 genomic DNA using the oligonucleotides *pyrS*\_pCOLA\_FW and *pyrS*\_pCOLA\_Rev. The vector pCOLADuet-1 and *PyrS* PCR

product were both digested with restriction enzymes BamHI and HindIII and ligated using the T4 DNA Ligase. This mixture was then used to transform *E. coli* DH10B by electroporation (1250 V). After plasmid extraction the obtained plasmid was verified by sequencing at SeqIT GmbH (Germany, Kaiserslautern). The verified plasmid was used to transform *E. coli* BL21 (DE3) Star by electroporation. The construction of pCom10\_*pyrS* was performed using the Gibson assembly method [3]. Therefore the vector was amplified via PCR using the oligonucleotides pCom10\_Fw and pCom10\_Rev. *PyrS* was amplified using the oligonucleotides *pyrS*\_pCom\_Fw and *pyrS*\_pCom\_Rev and pCOLA\_*pyrS* as template, the oligonucleotides were previously modified with a 30 bp 3' overhang which are homologues to the amplified pCom10 product. Both products were then incubated with the Gibson assembly mix for 1 h at 50 °C. This mixture was then used to transform *E. coli* DH10B by electroporation as described earlier. The plasmid was obtained by using the extraction protocol described previously.

**Electrotransformation of *Pseudomonas* strains.** *Pseudomonas putida* KT2440 and *Pseudomonas* sp. GM30 were grown over night at 30 °C in liquid LB media. To prepare cells for electro transformation 2 mL of fresh liquid LB media were inoculated with an overnight culture (1:100) and were then grown for 3 hours at 30 °C. The cells were then centrifuged and washed twice with cold water. Centrifuged cells were then resuspended in 50 µL cold water and cells were kept on ice. 1 µL of plasmid was used to transform *Pseudomonas* strains by electroporation (2500 V).

**Analytical scale culture extraction.** In order to detect photopyrone production in the wildtype and mutant strains by means of HPLC/MS, 20 mL of liquid LB-medium, containing the appropriate resistant markers, were inoculated with an overnight culture to an optical density of  $OD_{600} = 0.05$  and cultivated for 3.5 h at 37 °C. Then

0.01 mM isopropyl- $\beta$ -D-thiogalactopyranoside (IPTG) (Fermentas) and 2% Amberlite™ XAD16 (Sigma-Aldrich) were added to the culture, which was cultivated for 48 h at 16 °C. For detection of pseudopyronines 20 mL of liquid LB-medium, containing the appropriate resistant marker and 2% Amberlite™ XAD16, were inoculated with an overnight culture (1:100). Expression was induced with addition of 0.05% (v/v) dicyclopropyl ketone. The *Pseudomonas* containing cultures were then incubated for 72 h at 30 °C. After 48 h again 0.05% (v/v) of dicyclopropyl ketone was added. Cultures were harvested by centrifugation (4000 rpm, 10 min, 18 °C) followed by removal of the supernatant. Amberlite™ XAD16 resins were extracted with 30 mL of methanol and incubated for 1 h under constant rotation followed by a filtration step (Folded Filters (Quality), grade: 3 m/N, Munktell) to remove cells and resins. The elution step was repeated once with 10 mL of methanol. The methanol extract was then concentrated to dryness using a rotary evaporator. The solid residue was redissolved in 2 mL of methanol and a 1:10 dilution was analyzed by means of HPLC/MS. Extracts were analyzed using a Dionex UltiMate 3000 system coupled to a Bruker Daltonik AmaZon X mass spectrometer, a RP18-column (50 mm  $\times$  2.1 mm  $\times$  1.7  $\mu$ m; Waters GmbH) and an acetonitrile/0.1% formic acid in H<sub>2</sub>O gradient, ranging from 5 to 95% in 22 min at a flow rate of 0.6 mL/min. The production of *ppyS* mutants of **4** was calculated against standard concentrations of the main compound photopyrone D (**4**) produced by wildtype *ppyS*. The retention time of **4** under these conditions was 10.5 min.

**Preparative extraction and purification.** For the isolation of compounds **9–11** from *Pseudomonas* sp. GM30, the strain was cultivated in 6 L of LB-medium, with an addition of 2% Amberlite™ XAD16 for 3 days at 30 °C. Cultures were harvested by centrifugation (4000 rpm, 10 min, 18 °C) followed by removal of the supernatant.

Amberlite™ XAD16 resins were extracted with methanol and incubated for 1 h under constant rotation followed by a filtration step to remove cells and resins. The methanol extract was then concentrated to dryness using a rotary evaporator. The solid residue (4.6 g) was redissolved in 10 mL of water, then 20 mL of ethyl acetate was added and the mixture was shaken in a separating funnel. This step was repeated two times with the addition of 20 mL of ethyl acetate and separation. The ethyl acetate phase was then concentrated to dryness using a rotary evaporator. The solid residue (0.7 g) was redissolved in a 70% dimethyl sulfoxide (DMSO), 20% methanol and 10% isopropanol mixture. Compounds were then isolated with a Waters Bridge XBridge™ Prep C18 5 μm OBD™ 19 × 150 mm Column (S/N) and a Waters HPLC-MS system as described in the following: Waters 3100 Mass Detector, Waters 2998 Photodiode Array Detector, Waters SFO System Fluidics Organizer, Waters 515 HPLC Pump, Waters 2545 Binary Gradient Module, Waters Selector Valve, Waters 2767 Sample Manager. The purification was performed at a flow rate of 24 mL/min with an acetonitrile–water (0.1% formic acid) gradient: 0–26 min 50–75%, 26.1–30 min 76–95%. The combined fractions were then concentrated to dryness using a rotary evaporator to give 4.8 mg, 35.6 mg and 1.6 mg of **9**, **10** and **11**, respectively.

**NMR.** 1D and 2D nuclear magnetic resonance (NMR) spectra for purified compounds were recorded on a Bruker DRX 500 spectrometer using deuterated dimethyl sulfoxide as solvent and internal standard.

**HR-ESI-MS.** Determination of exact masses of **9–11** were carried out using a Dionex Ultimate 3000 RSLC coupled to a Bruker micrOTOF-Q II equipped with an ESI source. The following masses were detected: for **9**,  $m/z$  267.1956 (*calcd* for  $[C_{16}H_{26}O_3 + H]^+$ , 267.1955,  $\Delta = 0.38$  ppm); **10**,  $m/z$  295.2270 (*calcd* for  $[C_{18}H_{30}O_3 +$

H]<sup>+</sup>, 295.2268,  $\Delta$  = 0.68 ppm); **11**,  $m/z$  323.2583 (*calcd* for [C<sub>20</sub>H<sub>34</sub>O<sub>3</sub> + H]<sup>+</sup>, 323.2581,  $\Delta$  = 0.62 ppm).

**Homology modelling.** The protein sequences of PpyS and PyrS were used as queries for BLASTP [4] searches in the PDB [5], to identify the most similar available structure in the PDB. This resulted in the identification of OleA (sequence identity 27%, E-value 1e-14, PDB: 3S21) from *Xanthomonas campestris* for PpyS and OleA (sequence identity 37%, E-value 4e-10, PDB: 3S21) for PyrS-. These template structures were used to create a sequence alignment applying the ClustalW algorithm [6]. The homology models were generated using the Homology Modelling Tool integrated in MOE 2012.10 (Molecular Operating Environment; Chemical Computing Group Inc., Montreal, Canada) and the ClustalW sequence alignment was imported. A series of ten models was created, for further processing the one with the highest packing quality score was chosen and energy minimized applying the AMBER12EHT (integrated in MOE) force field. All figures showing protein structures in this work, were created using MOE.

**Docking.** Protein–ligand docking calculations were carried out using the program GOLD (version 5.2) [7] using the empirical scoring function for advanced protein–ligand docking CHEMPLP [8]. For each docking study the result with the highest docking score is shown in this work.

**Phylogenetic analysis.** A PHYML [9] tree (50 bootstraps) was calculated using a ClustalW alignment (gap opening: 10; gap extension: 0.1), which was generated using the collected ketosynthases. For visualization and calculation of the alignment as well as the PHYML tree the Geneious software (Biomatters Ltd., New Zealand) was used.

## Supplementary Tables and Figures

**Table S1:** Strains used in this work.

| Strain                           | Genotype                                                                                                                                                                                                                            | Reference  |
|----------------------------------|-------------------------------------------------------------------------------------------------------------------------------------------------------------------------------------------------------------------------------------|------------|
| <i>E. coli</i> DH10B             | F_ <i>mcrA</i> ( <i>mrr-hsdRMS-mcrBC</i> ), 80 <i>lacZ</i><br>$\Delta$ , M15, $\Delta$ <i>lacX74 recA1 endA1 araD</i> 139<br>$\Delta$ ( <i>ara, leu</i> )7697 <i>galU galK</i> $\lambda$ <i>rpsL</i> ( <i>Strr</i> )<br><i>nupG</i> | [10]       |
| <i>E. coli</i> BL21 (DE3) Star   | F- <i>ompT hsdSB</i> (rB-, mB-) <i>gal dcm</i><br><i>rne131</i> (DE3)                                                                                                                                                               | Invitrogen |
| <i>Pseudomonas</i> sp. GM30      | Wildtype                                                                                                                                                                                                                            | [11]       |
| <i>Pseudomonas putida</i> KT2440 | Wildtype                                                                                                                                                                                                                            | [12]       |
| WT                               | BL21 (DE3) Star:pCOLA_ <i>ppyS</i> ,<br>pACYC_ <i>bkdABC_ngrA</i> , Km <sup>R</sup> , Cm <sup>R</sup>                                                                                                                               | [2]        |
| C129A                            | BL21 (DE3) Star:pCOLA_ <i>ppyS_C129A</i> ,<br>pACYC_ <i>bkdABC_ngrA</i> , Km <sup>R</sup> , Cm <sup>R</sup>                                                                                                                         | this work  |
| H281A                            | BL21 (DE3) Star:pCOLA_ <i>ppyS_H281A</i> ,<br>pACYC_ <i>bkdABC_ngrA</i> , Km <sup>R</sup> , Cm <sup>R</sup>                                                                                                                         | this work  |
| N310A                            | BL21 (DE3) Star:pCOLA_ <i>ppyS_N310A</i> ,<br>pACYC_ <i>bkdABC_ngrA</i> , Km <sup>R</sup> , Cm <sup>R</sup>                                                                                                                         | this work  |
| E105A                            | BL21 (DE3) Star:pCOLA_ <i>ppyS_E105A</i> ,<br>pACYC_ <i>bkdABC_ngrA</i> , Km <sup>R</sup> , Cm <sup>R</sup>                                                                                                                         | this work  |
| R121D                            | BL21 (DE3) Star:pCOLA_ <i>ppyS_R121D</i> ,<br>pACYC_ <i>bkdABC_ngrA</i> , Km <sup>R</sup> , Cm <sup>R</sup>                                                                                                                         | this work  |
| E330A                            | BL21 (DE3) Star:pCOLA_ <i>ppyS_E330A</i> ,<br>pACYC_ <i>bkdABC_ngrA</i> , Km <sup>R</sup> , Cm <sup>R</sup>                                                                                                                         | this work  |
| <i>E. coli</i> DH10B             | <i>E. coli</i> DH10B:pCOLA_ <i>pyrS</i><br>pCOLA_ <i>pyrS</i>                                                                                                                                                                       | this work  |
| <i>E. coli</i> BL21 (DE3) Star   | <i>E. coli</i> BL21 (DE3) Star:pCOLA_ <i>pyrS</i><br>pCOLA_ <i>pyrS</i>                                                                                                                                                             | this work  |
| <i>E. coli</i> DH10B             | <i>E. coli</i> DH10B:pCom10_ <i>pyrS</i><br>pCom10_ <i>pyrS</i>                                                                                                                                                                     | this work  |

|                             |                                         |           |
|-----------------------------|-----------------------------------------|-----------|
| <i>P. putida</i> KT2440     | <i>Pseudomonas putida</i>               | this work |
| pCom10_pyrS                 | KT2440:pCom10_pyrS                      |           |
| <i>Pseudomonas</i> sp. Gm30 | <i>Pseudomonas</i> sp. GM30:pCom10_pyrS | this work |
| pCom10_pyrS                 |                                         |           |

**Table S2:** Plasmids used in this work.

| Plasmid           | Genotype                                                    | Reference       |
|-------------------|-------------------------------------------------------------|-----------------|
| pCOLADuet-1       | ColA ori, Km <sup>R</sup> , T7lac promotor                  | Merck Millipore |
| pACYCDuet-1       | CloDF13 ori, Cm <sup>R</sup> , T7lac promotor               | Merck Millipore |
| pCOLA_ppyS        | ColA ori, Km <sup>R</sup> , T7lac promotor, ppyS            | [2]             |
| pACYC_bkdABC_ngrA | CloDF13 ori, Cm <sup>R</sup> , T7lac promotor, bkdABC, ngrA | [2]             |
| pCOLA_ppyS_C129A  | ColA ori, Km <sup>R</sup> , T7lac promotor, ppyS            | this work       |
| pCOLA_ppyS_H281A  | ColA ori, Km <sup>R</sup> , T7lac promotor, ppyS            | this work       |
| pCOLA_ppyS_N310A  | ColA ori, Km <sup>R</sup> , T7lac promotor, ppyS            | this work       |
| pCOLA_ppyS_E105A  | ColA ori, Km <sup>R</sup> , T7lac promotor, ppyS            | this work       |
| pCOLA_ppyS_R121D  | ColA ori, Km <sup>R</sup> , T7lac promotor, ppyS            | this work       |
| pCOLA_ppyS_E330A  | ColA ori, Km <sup>R</sup> , T7lac promotor, ppyS            | this work       |
| pCom10            | pBR322 ori, Km <sup>R</sup> , alkB promotor                 | [13]            |
| pCom10_pyrS       | pBR322 ori, Km <sup>R</sup> , alkB promotor, pyrS           | this work       |
| pCOLA_pyrS        | ColA ori, Km <sup>R</sup> , T7lac promotor, pyrS            | this work       |

**Table S3:** Oligonucleotides used in this work.

| Oligonucleotide | Sequence                       |
|-----------------|--------------------------------|
| Cys129_Fw.ds    | CGCCGCGAACGGT                  |
| Cys129_Rev.ds   | CCGTTTCGCGGCGT                 |
| Cys129_Fw.V.P   | TGGGTGGCAGCTATGGATATTATCAATAG  |
| Cys129_Rev.V.P  | CTACAACATCGTAGTTCCTACAAGTTAGCC |
| Glu105_Fw.ds    | TAGCGCCAGCTAACAGTACTT          |
| Glu105_Rev.ds   | AGTACTGTTAGCTGGCGCTAT          |
| Glu105_Fw.V.P   | TTGTCTCAAAGGCACTAGGGCTAACTTGT  |
| Glu105_Rev.V.P  | GAAGCCGCGGGCAACTGG             |
| His281_Fw.ds    | TTTTTATTGCGACAGGTTACCAAAAACGT  |
| His281_Rev.ds   | CGTTTTTGGTGAACCTGTCGCAATAAAAAT |
| His281_Fw.V.P   | GGGCACGCCTTGGTCAGAAGATG        |



|                        |                                                      |
|------------------------|------------------------------------------------------|
| His281_Rev.V.P         | ATGTTTCGATATCGTCAGATATTTTGTGATGATTA                  |
| Glu330_Fw.ds           | TATTGGCGAAAAATCAACTTTGTATGGGATGGGCT                  |
| Glu330_Rev.ds          | GCCCATCCCATACAAAGTTGATTTTTTCGCCAATAT                 |
| Glu330_Fw.V.P          | GGTAGTGGTGAATGGTCTTTGCCGC                            |
| Glu330_Rev.V.P         | ACCTTGATTAATGGCATCGAATATTCCGAACGG                    |
| Arg121Asp_Fw           | GATAACTACGATGTTGTAGACGCCTGTAAC                       |
| Arg121Asp_Rev          | ACAAGTTAGCCCTAGTGCCTTTGAGACAAA                       |
| Asn310_Fw              | ATTGCTACAGCATCTATCCCGTTCGGAAT                        |
| Asn310_Rev             | CGCACCTACCCGTTGGCCAAC                                |
| <i>pyrS</i> _pCOLA_FW  | AGGATCCGATGAAAATAGTTGGGCTGTCC                        |
| <i>pyrS</i> _pCOLA_Rev | CGCAAGCTTTGCTACAAGGTAAACGACAGTGCA                    |
| pCom10_Fw              | TCCAATTTTTATTAATTAGTCGCTACGAG                        |
| pCom10_Rev             | CTGTTTTGGCGGATGAGAGAAG                               |
| <i>pyrS</i> _pCom_Fw   | CTCGTAGCGACTAATTTAATAAAAATTGGAATGAAAATAGTTGGCTGTCC   |
| <i>pyrS</i> _pCom_Rev  | CTGAAAATCTTCTCTCATCCGCCAAAACAGCTACAAGGTAAACGACAGTGCG |

**Table S4:** Ketosynthases used for the phylogenetic tree. The sequences are ordered clockwise according to their location in the respective branches. All KS showing the conserved glutamic acid residue identified as catalytically important are shown in red.

| Protein                   | Organism                            | Accession number |
|---------------------------|-------------------------------------|------------------|
| <b>OleA homologues</b>    |                                     |                  |
| 1 3-Oxoacyl-ACP synthase  | <i>S. sp. NRRL F-5555</i>           | WP_030402327     |
| 2 3-Oxoacyl-ACP synthase  | <i>Streptomyces</i>                 | WP_031086294     |
| 3 3-Oxoacyl-ACP synthase  | <i>S. sp. NRRL F-5650</i>           | WP_031039494     |
| 4 3-Oxoacyl-ACP synthase  | <i>A. rifamycini</i>                | WP_026404743     |
| 5 3-Oxoacyl-ACP synthase  | <i>M. rosea</i>                     | WP_036407026     |
| 6 3-Oxoacyl-ACP synthase  | <i>N. candida</i>                   | WP_043622914     |
| 7 3-Oxoacyl-ACP synthase  | <i>S. pristinaespiralis</i>         | WP_005309093     |
| 8 3-Oxoacyl-ACP synthase  | <i>T. sp. 28</i>                    | WP_045191732     |
| 9 3-Oxoacyl-ACP synthase  | <i>S. hofmanni</i>                  | WP_017748751     |
| 10 3-Oxoacyl-ACP synthase | <i>L. araneosa</i>                  | WP_007281261     |
| 11 OleA                   | <i>X. campestris pv. campestris</i> | 3S21_A           |
| 12 3-Oxoacyl-ACP synthase | <i>S. amylolyticus</i>              | AKF07269         |
| 13 3-Oxoacyl-ACP synthase | <i>B. muris</i>                     | WP_017822397     |
| 14 3-Oxoacyl-ACP synthase | <i>A. phenanthrenivorans</i>        | WP_043453199     |
| 15 3-Oxoacyl-ACP synthase | <i>Arthrobacter</i>                 | WP_018779660     |
| 16 3-Oxoacyl-ACP synthase | <i>A. sp. MWB30</i>                 | KIA73109         |
| 17 3-Oxoacyl-ACP synthase | <i>L. rubra</i>                     | WP_021808728     |
| 18 3-Oxoacyl-ACP synthase | <i>M. yannicii</i>                  | WP_040569064     |
| 19 3-Oxoacyl-ACP synthase | <i>M. sp. B19</i>                   | WP_026096098     |
| 20 3-Oxoacyl-ACP synthase | <i>M. testaceum</i>                 | WP_043360932     |
| 21 3-Oxoacyl-ACP synthase | <i>M. testaceum StLB037</i>         | BAJ73499         |
| 22 3-Oxoacyl-ACP synthase | <i>M. sp. SUBG005</i>               | KEP74827         |
| <b>PpyS homologues</b>    |                                     |                  |
| 23 3-Oxoacyl-ACP synthase | <i>X. nematophila</i>               | WP_010847197     |
| 24 3-Oxoacyl-ACP synthase | <i>X. nematophila ATCC 19061</i>    | YP_003713506     |

|    |                        |                                  |              |
|----|------------------------|----------------------------------|--------------|
| 25 | 3-Oxoacyl-ACP synthase | <i>X. nematophila</i>            | WP_013184973 |
| 26 | 3-Oxoacyl-ACP synthase | <i>X. bovienii</i>               | WP_038246124 |
| 27 | 3-Oxoacyl-ACP synthase | <i>X. bovienii</i>               | WP_038180969 |
| 28 | PpyS                   | <i>P. luminescens</i> TT01       | AGO97060     |
| 29 | 3-Oxoacyl-ACP synthase | <i>P. luminescens</i> TT01       | CAE17216     |
| 30 | 3-Oxoacyl-ACP synthase | <i>P. luminescens</i> TT01       | WP_046396397 |
| 31 | 3-Oxoacyl-ACP synthase | <i>P. sp.</i> PH1b               | WP_025131331 |
| 32 | 3-Oxoacyl-ACP synthase | <i>P. sp.</i> St29               | BAQ80432     |
| 33 | 3-Oxoacyl-ACP synthase | <i>P. sp.</i> Os17               | BAQ74133     |
| 34 | 3-Oxoacyl-ACP synthase | <i>P. mosselii</i>               | WP_023630065 |
| 35 | 3-Oxoacyl-ACP synthase | <i>P. mosselii</i>               | WP_028692573 |
| 36 | PyrS                   | <i>P. sp.</i> GM30               | WP_007967127 |
| 37 | 3-Oxoacyl-ACP synthase | <i>P. sp.</i> URIL14HWK12:I6     | WP_027611766 |
| 38 | 3-Oxoacyl-ACP synthase | <i>P. sp.</i> W15Feb9B           | WP_041064001 |
| 39 | 3-Oxoacyl-ACP synthase | <i>B. sp.</i> UYPR1.413          | WP_028370407 |
| 40 | 3-Oxoacyl-ACP synthase | <i>B. bannensis</i>              | WP_027819887 |
| 41 | 3-Oxoacyl-ACP synthase | <i>B. mimosarum</i>              | WP_028232503 |
| 42 | 3-Oxoacyl-ACP synthase | <i>B. nodosa</i>                 | WP_028204568 |
| 43 | 3-Oxoacyl-ACP synthase | <i>B. heleia</i>                 | WP_042262981 |
| 44 | 3-Oxoacyl-ACP synthase | <i>B. phytofirmans</i> PsJN      | YP_001889944 |
| 45 | 3-Oxoacyl-ACP synthase | <i>B. phytofirmans</i>           | WP_012428081 |
| 46 | 3-Oxoacyl-ACP synthase | <i>B. sp.</i> WSM2230            | WP_025596424 |
| 47 | 3-Oxoacyl-ACP synthase | <i>B. sp.</i> WSM2232            | WP_027214818 |
| 48 | 3-Oxoacyl-ACP synthase | <i>B. sp.</i> CCGE1003           | YP_003910175 |
| 49 | 3-Oxoacyl-ACP synthase | <i>B. sp.</i> CCGE1003           | WP_013342411 |
| 50 | 3-Oxoacyl-ACP synthase | <i>B. sp.</i> WSM3556            | WP_027802201 |
| 51 | 3-Oxoacyl-ACP synthase | <i>B. graminis</i>               | WP_006049675 |
| 52 | 3-Oxoacyl-ACP synthase | <i>B. sp.</i> URHA0054           | WP_029966890 |
| 53 | 3-Oxoacyl-ACP synthase | <i>B. sp.</i> CCGE1001           | YP_004230959 |
| 54 | 3-Oxoacyl-ACP synthase | <i>B. sp.</i> CCGE1001           | WP_013591004 |
| 55 | 3-Oxoacyl-ACP synthase | <i>B. phenoliruptrix</i> BR3459a | YP_006793509 |
| 56 | 3-Oxoacyl-ACP synthase | <i>Burkholderia</i>              | WP_014972441 |
| 57 | 3-Oxoacyl-ACP synthase | <i>L. anisa</i>                  | WP_019234674 |
| 58 | 3-Oxoacyl-ACP synthase | <i>L. pneumophila</i>            | WP_028378564 |
| 59 | 3-Oxoacyl-ACP synthase | <i>S. sp.</i> CNB091             | WP_018955464 |
| 60 | 3-Oxoacyl-ACP synthase | <i>A. mirum</i>                  | WP_015801934 |
| 61 | 3-Oxoacyl-ACP synthase | <i>A. azurea</i>                 | WP_005164847 |
| 62 | 3-Oxoacyl-ACP synthase | <i>S. sp.</i> MspMP-M5           | WP_018537413 |
| 63 | 3-Oxoacyl-ACP synthase | <i>N. abscessus</i>              | WP_043690931 |
| 64 | 3-Oxoacyl-ACP synthase | <i>N. sp.</i> CNY236             | WP_028478668 |
| 65 | 3-Oxoacyl-ACP synthase | <i>N. farcinica</i>              | WP_011207969 |
| 66 | 3-Oxoacyl-ACP synthase | <i>N. higoensis</i>              | WP_040795117 |
| 67 | 3-Oxoacyl-ACP synthase | <i>G. mallensis</i>              | WP_014267925 |
| 68 | 3-Oxoacyl-ACP synthase | <i>T. campylonemoides</i>        | WP_041033411 |
| 69 | 3-Oxoacyl-ACP synthase | <i>A. sp.</i> PCC 7108           | WP_016949109 |
| 70 | 3-Oxoacyl-ACP synthase | <i>M. sp.</i> SC2                | WP_014890909 |
| 71 | 3-Oxoacyl-ACP synthase | <i>M. rosea</i>                  | WP_018405831 |
| 72 | 3-Oxoacyl-ACP synthase | <i>M. sp.</i> SB2                | WP_029650722 |
| 73 | 3-Oxoacyl-ACP synthase | <i>M. sp.</i> T1-4               | WP_008198039 |
| 74 | 3-Oxoacyl-ACP synthase | <i>C. fritschii</i>              | WP_016876568 |

**Closest BLAST-P hits for XclC**  
[14]

|    |                        |                          |                |
|----|------------------------|--------------------------|----------------|
| 75 | 3-Oxoacyl-ACP synthase | <i>C. acetobutylicum</i> | NP_347450.1    |
| 76 | 3-Oxoacyl-ACP synthase | <i>P. lactis</i>         | WP_007130623.1 |
| 77 | 3-Oxoacyl-ACP synthase | <i>B. thuringiensis</i>  | YP_006930640.1 |
| 78 | 3-Oxoacyl-ACP synthase | <i>B. sp.</i> 1NLA3E     | YP_007911827.1 |
| 79 | 3-Oxoacyl-ACP synthase | <i>O. scapharcae</i>     | WP_010098042.1 |
| 80 | 3-Oxoacyl-ACP synthase | <i>P. polymyxa</i>       | YP_003947618.1 |
| 81 | 3-Oxoacyl-ACP synthase | <i>P. polymyxa</i>       | YP_003871436.1 |
| 82 | 3-Oxoacyl-ACP synthase | <i>P. sp.</i> Aloe-11    | WP_007431139.1 |
| 83 | 3-Oxoacyl-ACP synthase | <i>P. terrae</i>         | YP_005077926.1 |

|     |                                       |                            |                |
|-----|---------------------------------------|----------------------------|----------------|
| 84  | 3-Oxoacyl-ACP synthase<br><b>FabH</b> | <i>P. peoriae</i>          | WP_010345468.1 |
| 85  | CorB                                  | <i>C. coralloides</i>      | ADI59524       |
| 86  | Myxopyronin ketosynthase              | <i>M. fulvus</i>           | AGS77282       |
| 87  | FabHB                                 | <i>B. subtilis</i>         | NP_388898      |
| 88  | FabH                                  | <i>N. punctiforme</i>      | YP_001865657   |
| 89  | 3-oxoacyl-ACP synthase                | <i>B. subtilis</i>         | NP_389015.1    |
| 90  | FabH                                  | <i>A. fabrum</i>           | NP_354198      |
| 91  | FabH                                  | <i>P. luminescens</i>      | NP_930069      |
| 92  | FabH                                  | <i>E. coli</i>             | NP_287225      |
| 93  | FabH                                  | <i>S. griseus</i>          | YP_001826619   |
| 94  | FabH                                  | <i>S. echinatus</i>        | AAV84077       |
| 95  | NP_626634                             | <i>S. coelicolor</i> A3(2) | NP_626634      |
| 96  | FabH                                  | <i>S. avermitilis</i>      | BAC73499       |
| 97  | Q54206                                | <i>S. glaucescens</i>      | Q54206         |
| 98  | FdmS                                  | <i>S. griseus</i>          | AAQ08929       |
| 99  | CAM58805_S._sp._BenQ                  | <i>S. sp.</i> A2991200     | CAM58805       |
| 100 | ZhuH 1MZJ                             | <i>S. sp.</i> R1128        | AAG30195       |
| 101 | Frnl                                  | <i>S. roseofulvus</i>      | AAC18104       |
| 102 | Alnl                                  | <i>S. sp.</i> CM020        | ACI88883       |
|     | <b>KS type I PKS</b>                  |                            |                |
| 103 | Plu1885                               | <i>P. luminescens</i>      | NP_929153      |
| 104 | NanA8                                 | <i>S. nanchangensis</i>    | AAP42874       |
| 105 | EryAII                                | <i>S. erythraea</i>        | YP_001102990   |
| 106 | TylGI KSQ                             | <i>S. fradiae</i>          | AAB66504       |
| 107 | MerA                                  | <i>S. violaceusniger</i>   | ABJ97437       |
| 108 | TamAI                                 | <i>S. sp.</i> 3079         | ADC79637       |
| 109 | OleAI KSQ                             | <i>S. antibioticus</i>     | AAF82408       |
| 110 | HedT                                  | <i>S. griseoruber</i>      | AAP85336       |
|     | <b>Closest BLAST-P hits for XclF</b>  |                            |                |
| 111 | 3-Oxoacyl-ACP synthase                | <i>R. blandensis</i>       | WP_008043745.1 |
| 112 | 3-Oxoacyl-ACP synthase                | <i>X. nematophila</i>      | YP_003714026.1 |
| 113 | 3-Oxoacyl-ACP synthase                | <i>X. nematophila</i>      | WP_010848687.1 |
| 114 | 3-Oxoacyl-ACP synthase                | <i>M. sp.</i> PE36         | WP_006034384.1 |
| 115 | 3-Oxoacyl-ACP synthase                | <i>P. profundum</i>        | YP_132684.1    |
| 116 | 3-Oxoacyl-ACP synthase                | <i>P. damsela</i>          | WP_005305524.1 |
| 117 | 3-Oxoacyl-ACP synthase                | <i>P. sp.</i> AK15         | WP_007465048.1 |
| 118 | 3-Oxoacyl-ACP synthase                | <i>P. leiognathi</i>       | WP_008989540.1 |
| 119 | 3-Oxoacyl-ACP synthase                | <i>P. sp.</i> SKA34        | WP_006644045.1 |
| 120 | 3-Oxoacyl-ACP synthase                | <i>P. angustum</i>         | WP_005364526.1 |
|     | <b>FabF</b>                           |                            |                |
| 121 | FabF                                  | <i>M. sp.</i> 4-46         | YP_001771620   |
| 122 | FabF                                  | <i>C. pinensis</i>         | ACU62401       |
| 123 | cpin1855                              | <i>C. pinensis</i>         | YP_003121552   |
| 124 | Dfer_1997                             | <i>D. fermentans</i>       | YP_003086385   |
| 125 | FabB                                  | <i>A. pleuropneumoniae</i> | ZP_00134992    |
| 126 | FabB                                  | <i>C. sp.</i> 30_2         | ZP_04562837    |
| 127 | NP_416826                             | <i>E. coli</i>             | NP_416826      |
| 128 | FabB                                  | <i>S. boydii</i>           | YP_001881145   |
|     | <b>Type II PKS KS b</b>               |                            |                |
| 129 | NP_344945                             | <i>S. pneumoniae</i>       | NP_344945      |
| 130 | FabF                                  | <i>T. thermophilus</i>     | YP_143679      |
| 131 | FabF                                  | <i>N. punctiforme</i>      | YP_001867862   |
| 132 | FabF                                  | <i>B. subtilis</i>         | NP_389016      |
| 133 | NP_645683                             | <i>S. aureus</i>           | NP_645683      |
| 134 | FabF                                  | <i>P. luminescens</i>      | NP_930065      |
| 135 | FabF                                  | <i>E. albertii</i>         | ZP_02902779.1  |
| 136 | FabF                                  | <i>E. coli</i>             | NP_287229      |
| 137 | NP_415613                             | <i>E. coli</i>             | NP_415613      |
| 138 | FabF                                  | <i>S. avermitilis</i>      | BAC70003       |
|     | <b>Type II PKS KS a</b>               |                            |                |

|     |                                       |                                    |                |
|-----|---------------------------------------|------------------------------------|----------------|
| 139 | SimA2                                 | <i>S. antibioticus</i>             | AF324838_4     |
| 140 | TcmL                                  | <i>S. glaucescens</i>              | AAA67516       |
| 141 | EncB                                  | <i>S. maritimus</i>                | AAF81729       |
| 142 | ActIA                                 | <i>S. coelicolor</i> A3(2)         | SCO5087        |
| 143 | NcnB                                  | <i>S. arenae</i>                   | AAD20268       |
|     | <b>FabB</b>                           |                                    |                |
| 144 | AntD (Plu4191)                        | <i>P. luminescens</i>              | NP_931374      |
| 145 | EncA                                  | <i>S. maritimus</i>                | AAF81728       |
| 146 | ActiB                                 | <i>S. coelicolor</i> A3(2)         | SCO5088        |
| 147 | NcnA                                  | <i>S. arenae</i>                   | AAD20267       |
| 148 | TcmK                                  | <i>S. davawensis</i>               | CCK26894       |
| 149 | SimA1                                 | <i>S. antibioticus</i>             | AAK06784       |
|     | <b>ChIB6; CerJ; KSIII DpsC-like</b>   |                                    |                |
| 150 | ChIB6                                 | <i>S. antibioticus</i>             | AAZ77679       |
| 151 | CerJ                                  | <i>S. tendae</i>                   | AEI91069       |
| 152 | CosE                                  | <i>S. olindensis</i>               | ABC00733       |
| 153 | DpsC                                  | <i>S. peucetius</i>                | AAA65208       |
| 154 | AknE2                                 | <i>S. sp.</i> SPB74                | ZP_04991255.1  |
| 155 | AknE2                                 | <i>S. galilaeus</i>                | AAF70109       |
| 156 | BAB72048                              | <i>S. galilaeus</i>                | BAB72048       |
| 157 | PokM2                                 | <i>S. diastatochromogenes</i>      | ACN64832       |
| 158 | CalO4                                 | <i>S. aurantiaca</i>               | ZP_01462124    |
| 159 | FabH                                  | <i>S. erythraea</i>                | YP_001107471   |
| 160 | NdasDRAFT_3133                        | <i>N. dassonvillei</i>             | ZP_04334033.1  |
| 161 | ChIB3                                 | <i>S. antibioticus</i>             | AAZ77676       |
| 162 | CalO4                                 | <i>M. echinospora</i>              | AAM70354       |
| 163 | AviN                                  | <i>S. viridochromogenes</i>        | AAK83178       |
| 164 | PlaP2                                 | <i>S. sp.</i> Tu6071               | ABB69750       |
| 165 | CouN2                                 | <i>S. rishiriensis</i>             | AAG29787       |
| 166 | CloN2                                 | <i>S. roseochromogenes</i>         | AAN65231       |
|     | <b>Closest BLAST-P hits for XclB</b>  |                                    |                |
| 167 | 3-Oxoacyl-ACP synthase III            | <i>B. sp.</i> EniD312              | WP_009111263.1 |
| 168 | 3-Oxoacyl-ACP synthase III            | <i>A. nasoniae</i>                 | CBA73264.1     |
| 169 | 3-Oxoacyl-ACP synthase III            | <i>P. carotovorum</i>              | WP_010301235.1 |
| 170 | 3-Oxoacyl-ACP synthase III            | <i>P. pacifica</i>                 | WP_006975318.1 |
| 171 | 3-Oxoacyl-ACP synthase III            | <i>C. stagnale</i>                 | YP_007317906.1 |
| 172 | 3-Oxoacyl-ACP synthase III            | <i>N. punctiforme</i>              | YP_001865628.1 |
| 173 | 3-Oxoacyl-ACP synthase III            | <i>R. sp.</i> PCC 7116             | YP_007056099   |
| 174 | 3-Oxoacyl-ACP synthase III            | <i>S. cyanosphaera</i>             | YP_007130807.1 |
| 175 | 3-Oxoacyl-ACP synthase III            | <i>Calothrix sp.</i> PCC 6303      | YP_007138278   |
| 176 | 3-Oxoacyl-ACP synthase III            | <i>N. punctiforme</i>              | YP_001868566.1 |
| 177 | 3-Oxoacyl-ACP synthase III            | <i>R.sp.</i> PCC 7116              | YP_007057764.1 |
|     | <b>KS adjacent to XclA homologues</b> |                                    |                |
| 178 | 3-Oxoacyl-ACP synthase                | <i>C. sp.</i> PCC 7822             | YP_003899922.1 |
| 179 | 3-Oxoacyl-ACP synthase                | <i>N. punctiforme</i>              | YP_001865657.1 |
| 180 | 3-Oxoacyl-ACP synthase                | <i>A. cylindrica</i>               | YP_007155727.1 |
|     | <b>KS type III PKS</b>                |                                    |                |
| 181 | Chs-like                              | <i>R. baltica</i>                  | NP_868579      |
| 182 | BPS (PLN03172)                        | <i>H. androsaemum</i>              | Q8SAS8         |
| 183 | CHS H. (PLN03173)                     | <i>H. androsaemum</i>              | Q9FUB7         |
| 184 | CHS9                                  | <i>M. sativa</i>                   | AAA02827       |
| 185 | STS                                   | <i>P. quinquefolia</i>             | AAM21773       |
| 186 | BAS                                   | <i>R. palmatum</i>                 | AAK82824       |
| 187 | bpsA                                  | <i>B. subtilis</i> str. 168        | NP_390087      |
| 188 | MXAN_6639                             | <i>M. xanthus</i>                  | YP_634756      |
| 189 | PKS10                                 | <i>M. tuberculosis</i>             | NP_216176      |
| 190 | PKS11                                 | <i>M. tuberculosis</i>             | NP_216181      |
| 191 | Cpz6 Capramyzin ketosynthase          | <i>Streptomyces sp.</i> MK730-62F2 |                |
| 192 | Germicidin synthase                   | <i>Streptomyces coelicolor</i>     | 3V71_A         |
| 193 | RppA S                                | <i>S. antibioticus</i>             | BAB91443       |

|     |                     |                                |                |
|-----|---------------------|--------------------------------|----------------|
| 194 | RppA                | <i>S. avermitilis</i>          | NP_828307      |
| 195 | RppB                | <i>S. antibioticus</i>         | BAB91444       |
|     | <b>DarB</b>         |                                |                |
| 196 | O3I_37171           | <i>N. brasiliensis</i>         | ZP_09843377    |
| 197 | M446_0174           | <i>M. sp. 4-46</i>             | YP_001767187   |
| 198 | cpin6850            | <i>C. pinensis</i>             | YP_003126452   |
| 199 | BFO_3187            | <i>T. forsythia</i>            | YP_005015826   |
| 200 | NiasoDRAFT_0547     | <i>N. soli</i>                 | ZP_09632794    |
| 201 | Mucpa_6793          | <i>M. paludis</i>              | ZP_09618305    |
| 202 | Oweho_0889          | <i>O. hongkongensis</i>        | YP_004988545   |
| 203 | CHU_0390            | <i>C. hutchinsonii</i>         | YP_677020      |
| 204 | Fluta_1447          | <i>F. taffensis</i>            | YP_004344279   |
| 205 | Dfer_5797           | <i>D. fermentans</i>           | YP_003090150   |
| 206 | BZARG_2045          | <i>B. argentinensis</i>        | ZP_08820341    |
| 207 | Lacal_2074          | <i>L. sp. 5H-3-7-4</i>         | YP_004580348   |
| 208 | Aeqsu_0932          | <i>A. sublithincola</i>        | YP_006417450   |
| 209 | Zobellia_2074       | <i>Z. galactanivorans</i>      | YP_004736513   |
| 210 | Lbys_1508           | <i>L. byssophila</i>           | YP_003997574   |
| 211 | HMPREF0204_10987    | <i>C. gleum</i>                | ZP_07085127    |
| 212 | PMI13_02465         | <i>C. sp. CF314</i>            | ZP_10726507    |
| 213 | HMPREF0156_01383    | <i>B. taxon 274 str. F0058</i> | ZP_06983320    |
| 214 | HMPREF9071_0527     | <i>C. taxon 338 str. F0234</i> | ZP_08201061    |
| 215 | CAPGI0001_0843      | <i>C. gingivalis</i>           | ZP_04056582    |
| 216 | HMPREF1154_2288     | <i>C. sp. CM59</i>             | ZP_10880679    |
| 217 | HMPREF1320_1701     | <i>C. taxon 335 str. F0486</i> | EJF37460       |
| 218 | HMPREF1321_1154     | <i>C. taxon 412 str. F0487</i> | ZP_10366882    |
| 219 | CAPSP0001_1216      | <i>C. sputigena</i>            | ZP_03390203    |
| 220 | Coch_0547           | <i>C. ochracea</i>             | YP_003140666   |
| 221 | HMPREF1319_0374     | <i>C. ochracea</i>             | EJF43732       |
| 222 | HMPREF1977_1456     | <i>C. ochracea</i>             | ZP_07866642    |
| 223 | Weevi_1554          | <i>W. virosa</i>               | YP_004238832.1 |
| 224 | HMPREF9716_01579    | <i>M. odoratimimus</i>         | EKB07937       |
| 225 | Myrod_1723          | <i>M. odoratus</i>             | ZP_09672239    |
| 226 | HMPREF9711_01694    | <i>M. odoratimimus</i>         | EKB04829       |
| 227 | HMPREF9712_01161    | <i>M. odoratimimus</i>         | ZP_09523568    |
| 228 | Fcol_11845          | <i>F. columnare</i>            | YP_004942963   |
| 229 | FP2279              | <i>F. psychrophilum</i>        | YP_001297136   |
| 230 | PMI10_02641         | <i>F. sp. CF136</i>            | ZP_10730768    |
| 231 | FF52_12311          | <i>F. sp. F52</i>              | ZP_10481912    |
| 232 | Fjoh_1102           | <i>F. johnsoniae</i>           | YP_001193454   |
| 233 | FJSC11DRAFT_3961    | <i>F. sp. JSC-11</i>           | ZP_08987753    |
| 234 | MICAG_1820011       | <i>M. aeruginosa</i>           | CCI22605       |
| 235 | DP1817              | <i>D. psychrophila</i>         | YP_065553      |
| 236 | DaAHT2_1139         | <i>D. alkaliphilus</i>         | YP_003690456   |
| 237 | MldDRAFT_4065       | delta proteobacterium MLMS-1   | ZP_01289639    |
| 238 | CBGD1_514           | <i>S. gotlandica</i>           | ZP_05070248    |
| 239 | SMGD1_1386          | <i>S. gotlandica</i>           | EHP29910       |
| 240 | Sdel_2118           | <i>S. deleyianum</i>           | YP_003305165   |
| 241 | Sulba_2257          | <i>S. barnesii</i>             | YP_006405107   |
| 242 | Arnit_2310          | <i>A. nitrofigilis</i>         | YP_003656468   |
| 243 | HMPREF9401_0244     | <i>A. butzleri</i>             | ZP_07890833    |
| 244 | Hbal_2902           | <i>H. baltica</i>              | YP_003061270   |
| 245 | ParcA3_010100003428 | <i>P. arctica</i>              | ZP_10280196    |
| 246 | PspoU_010100018642  | <i>P. spongiae</i>             | ZP_10300425    |
| 247 | PSJM300_17945       | <i>P. stutzeri</i>             | AFN79642       |
| 248 | MDS_0597            | <i>P. mendocina</i>            | YP_004378380   |
| 249 | Psefu_0435          | <i>P. fulva</i>                | YP_004472512   |
| 250 | Plu2164             | <i>P. luminescens</i>          | NP_929424      |
| 251 | PA-RVA6-3077        | <i>P. asymbiotica</i>          | CAR66906       |
| 252 | PAU_02401           | <i>P. asymbiotica</i>          | YP_003041237   |
| 253 | PchlO6_4243         | <i>P. chlororaphis</i>         | ZP_10172862    |

|     |                  |                                |              |
|-----|------------------|--------------------------------|--------------|
| 254 | DarB             | <i>P. chlororaphis</i>         | AAN18032     |
| 255 | Pchl3084_3967    | <i>P. chlororaphis</i>         | EJL05977     |
| 256 | PMI20_00702      | <i>P. sp. GM17</i>             | ZP_10707840  |
| 257 | Daro_2368        | <i>D. aromatica</i>            | YP_285574    |
| 258 | azo0292 DarB     | <i>A. sp. BH72</i>             | YP_931796    |
| 259 | Rfer_3974        | <i>R. ferrireducens</i>        | YP_525203    |
| 260 | Slit_0359        | <i>S. lithotrophicus</i>       | YP_003522988 |
| 261 | PMI12_02025      | <i>V. sp. CF313</i>            | ZP_10567997  |
| 262 | Vapar_3389       | <i>V. paradoxus</i>            | YP_002945272 |
| 263 | Varpa_2231       | <i>V. paradoxus</i>            | YP_004154548 |
| 264 | COI_2002         | <i>M. haemolytica</i>          | ZP_05992665  |
| 265 | COK_0379         | <i>M. haemolytica</i>          | ZP_05988513  |
| 266 | HMPREF9417_0595  | <i>H. parainfluenzae</i>       | ZP_08147854  |
| 267 | HMPREF9952_1824  | <i>H. pittmaniae</i>           | ZP_08755481  |
| 268 | HMPREF9064_0174  | <i>A.segnis</i>                | ZP_07888807  |
| 269 | ATCC33389_0196   | <i>A. aphrophilus</i>          | EGY32238     |
| 270 | NT05HA_1737      | <i>A. aphrophilus</i>          | YP_003008155 |
| 271 | HMPREF9335_01583 | <i>A. aphrophilus</i>          | EHB89432     |
| 272 | GCWU000324_02596 | <i>K. oralis</i>               | ZP_04603113  |
| 273 | EIKCOROL_00456   | <i>E. corrodens</i>            | ZP_03712789  |
| 274 | HMPREF9371_1043  | <i>N. shayeganii</i>           | ZP_08886538  |
| 275 | HMPREF9370_1914  | <i>N. wadsworthii</i>          | ZP_08940206  |
| 276 | NEIFLAOT_02523   | <i>N. flavescens</i>           | ZP_03720660  |
| 277 | HMPREF0604_01363 | <i>N. mucosa</i>               | ZP_07993739  |
| 278 | NEIFL0001_0036   | <i>N. flavescens</i>           | ZP_04757628  |
| 279 | NEISUBOT_03200   | <i>N. subflava</i>             | ZP_05983976  |
| 280 | NEISICOT_02133   | <i>N. sicca</i>                | ZP_05318975  |
| 281 | HMPREF9418_1128  | <i>N. macacae</i>              | ZP_08684521  |
| 282 | HMPREF1051_1749  | <i>N. sicca</i>                | EIG27057     |
| 283 | HMPREF1028_00835 | <i>N. sp. GT4A_CT1</i>         | ZP_08888860  |
| 284 | HMPREF9016_01947 | <i>N. taxon 014 str. F0314</i> | ZP_06980826  |

---

**Table S5:** NMR spectroscopic data (400 MHz, *J* in Hz) of pseudopyronine A, B and C in DMSO-*d*<sub>6</sub>.

| Position | Pseudopyronine A |                              | Pseudopyronine B |                              | Pseudopyronine C |                              |
|----------|------------------|------------------------------|------------------|------------------------------|------------------|------------------------------|
|          | $\delta_c$       | $\delta_H$ ( <i>J</i> in Hz) | $\delta_c$       | $\delta_H$ ( <i>J</i> in Hz) | $\delta_c$       | $\delta_H$ ( <i>J</i> in Hz) |
| 2        | 164.9            | -                            | 165.0            | -                            | 166.9            | -                            |
| 3        | 100.7            | -                            | 101.3            | -                            | 101.5            | -                            |
| 3a       | 22.7             | 2.23 (t, 8.0, 2H)            | 22.7             | 2.24 (t, 8.0, 2H)            | 22.8             | 2.22 (t, 8.0, 2H)            |
| 3b       | 27.5             | 1.34 (m, 2H)                 | 27.5             | 1.35 (t br, 8.0, 2 H)        | 27.7             | 1.34 (t br, 8.0, 2 H)        |
| 3c       | 28.5             | 1.24 (m, 2H)                 | 28.6             | 1.26, (m, 2H)                | 28.8             | 1.23, (m, 2H)                |
| 3d       | 30.4             | 1.28 (m, 2H)                 | 31.2             | 1.25 (m, 2H)                 | 31.2             | 1.24 (m, 2H)                 |
| 3e       | 22.0             | 1.24 (m, 2H)                 | 22.0             | 1.26 (m, 2H)                 | 22.1             | 1.25 (m, 2H)                 |
| 3f       | 13.8             | 0.86 (m, 3H)                 | 14.0             | 0.84 (m, 3H)                 | 13.9             | 0.85 (m, 3H)                 |
| 4        | 162.2            | -                            | 164.8            | -                            | 165.1            | -                            |
| 5        | 99.9             | 5.91 (s, 1H)                 | 99.2             | 5.94 (s, 1H)                 | 100.4            | 5.86 (s, 1H)                 |
| 6        | 162.2            | -                            | 162.6            | -                            | 162.0            | -                            |
| 6a       | 32.5             | 2.36 (t, 8.0, 2H)            | 32.6             | 2.37 (t, 8.0, 2H)            | 32.6             | 2.34 (t, 8.0, 2H)            |
| 6b       | 25.8             | 1.52 (m, 2H)                 | 26.2             | 1.51 (t br, 8.0, 2H)         | 26.2             | 1.50 (t br, 8.0, 2H)         |
| 6c       | 31.1             | 1.26 (m, 2H)                 | 28.6             | 1.26 (m, 2H)                 | 28.6             | 1.26 (m, 2H)                 |
| 6d       | 21.7             | 1.26 (m, 2H)                 | 28.2             | 1.28 (m, 2H)                 | 28.2             | 1.26 (m, 2H)                 |
| 6e       | 13.7             | 0.86 (m, 3H)                 | 31.1             | 1.25 (m, 2H)                 | 28.6             | 1.28 (m, 2H)                 |
| 6f       |                  |                              | 22.0             | 1.26 (m, 2H)                 | 28.6             | 1.28 (m, 2H)                 |
| 6g       |                  |                              | 13.8             | 0.84 (m, 3H)                 | 31.2             | 1.26 (m, 2H)                 |
| 6h       |                  |                              |                  |                              | 22.1             | 1.26 (m, 2H)                 |
| 6i       |                  |                              |                  |                              | 13.9             | 0.85 (m, 3H)                 |

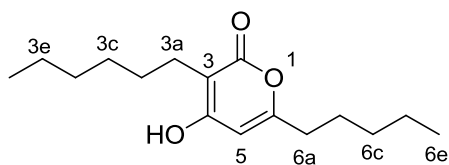

Pseudopyronine A

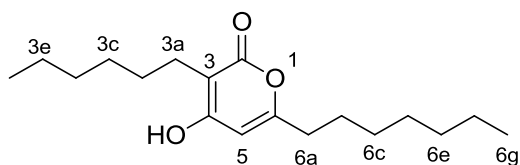

Pseudopyronine B

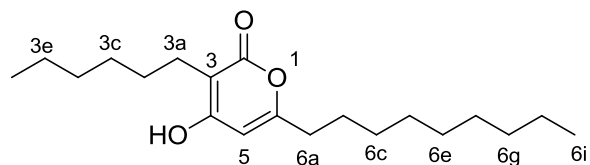

Pseudopyronine C

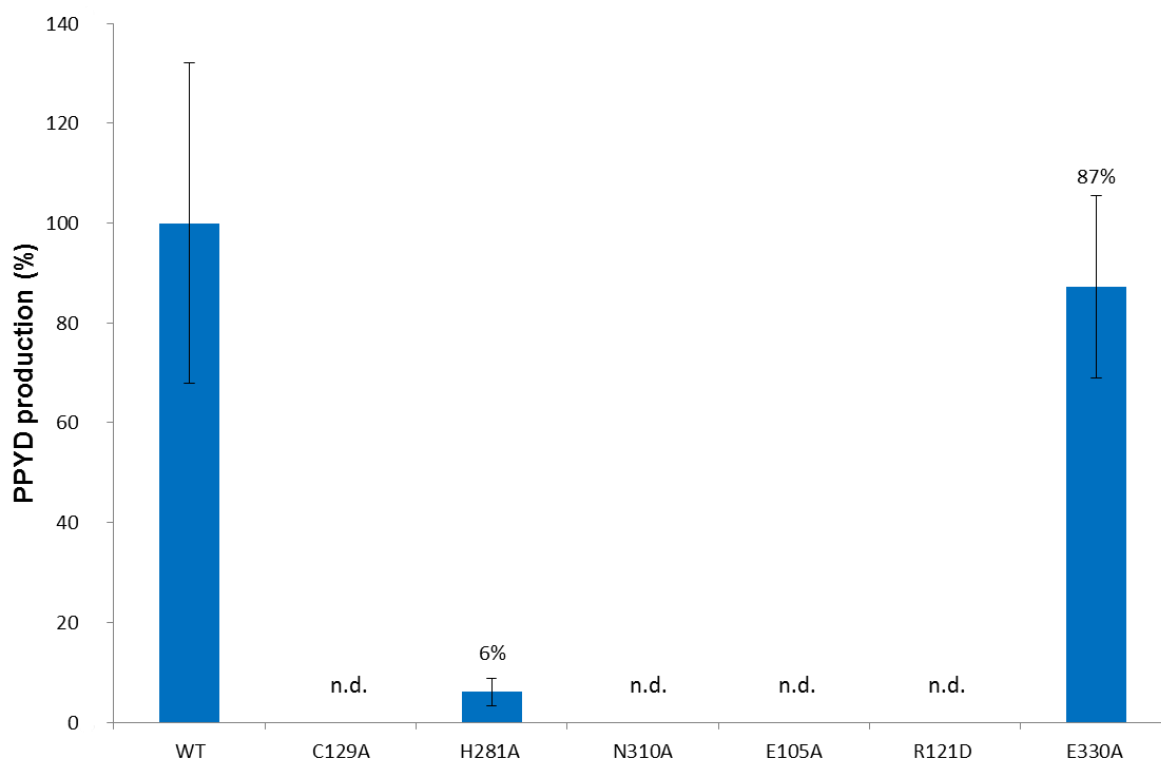

**Figure S1:** Analysis of amino acid substitutions for PpyS activity regarding the biosynthesis of photopyrone D (PPYD, **4**). The data is calculated in dependence to the production of the PpyS wildtype enzyme. Cys129, His281 and Asn310 form the catalytic triade, Glu105 is proposed to act as a catalytic base, Arg121 is located at the dimerization interface and Glu330 was used as a neutral control. In PpyS-C129A, -N310A, -E105A and -R121D the production of **4** was not detectable (n. d.) anymore.



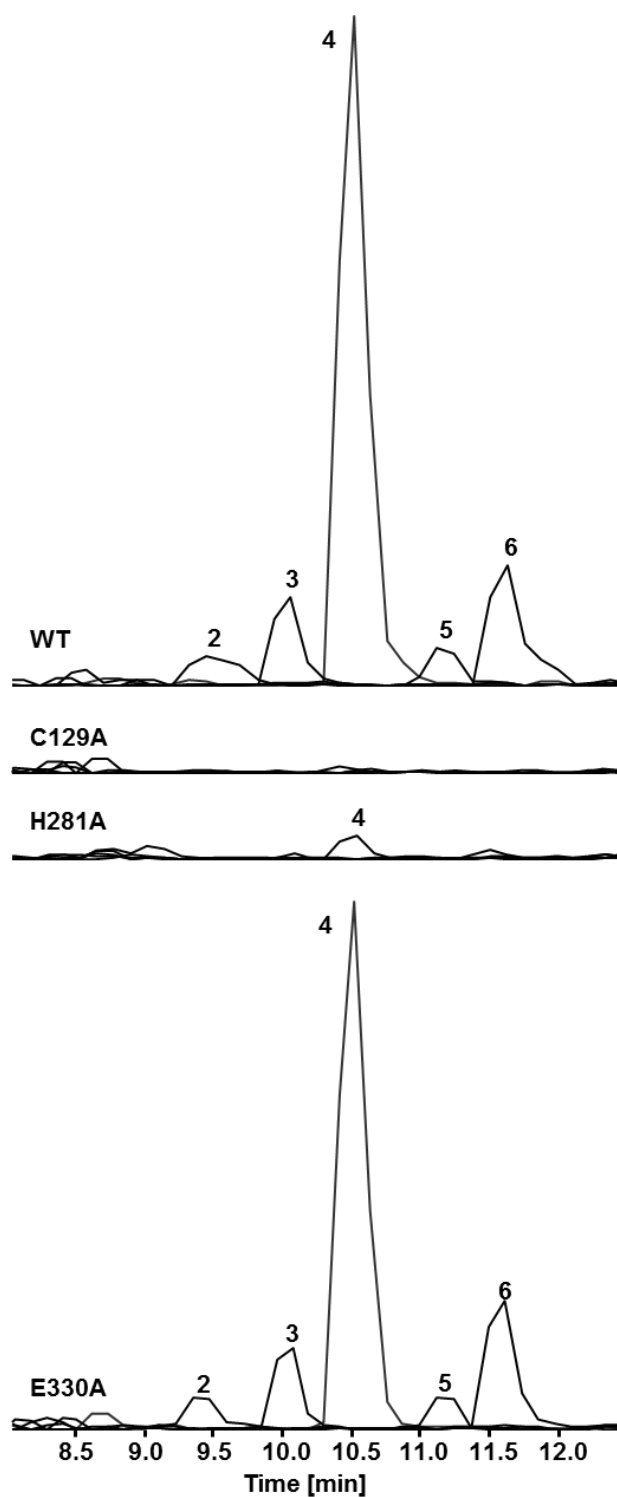

**Figure S2:** Extracted-ion chromatograms (EICs) of the most abundant photopyrones, which are produced heterologously in *E. coli* wildtype and mutant strains. **2** ( $m/z$  267.2  $[M + H]^+$ ), **3** ( $m/z$  281.2  $[M + H]^+$ ), **4** ( $m/z$  295.2  $[M + H]^+$ ), **5** ( $m/z$  309.2  $[M + H]^+$ ), **6** ( $m/z$  323.3  $[M + H]^+$ ). As the data for PpyS N310A, E105A and R121D look identical to C129A showing a complete loss of photopyrone production, they are not shown here.

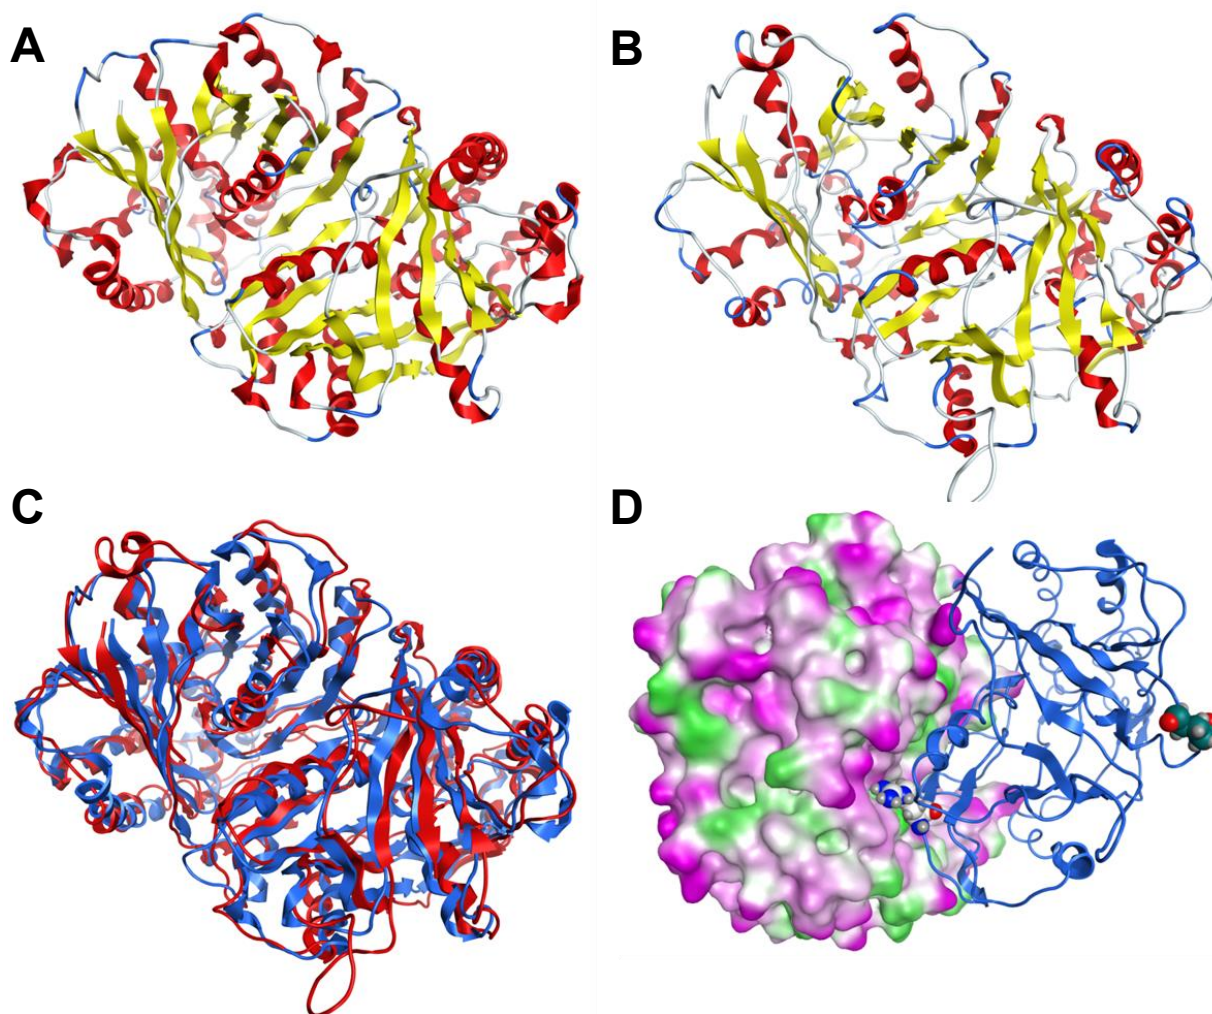

**Figure S3:** Structure of OleA-dimer (PDB: 3ROW) from *Xanthomonas campestris* (A). Modeled structure of PpyS-dimer from *P. luminescens* TT01 (B), which was generated using the OleA structure as a template: Red ( $\alpha$ -helices), yellow ( $\beta$ -sheets), blue (turns), white (random coils). The superposition of OleA (blue) and PpyS (red) structures (C) revealed a root-mean-square deviation (RMSD) of 2.0 Å. To picture the dimer interface of PpyS the surface of chain  $\alpha$  was calculated (green, magenta, and white represent a lipophilic, hydrophilic and neutral surface area, respectively) and the ribbon of chain  $\beta$  is shown (D). At the interface the atoms of Arg121 $\beta$  are represented as spheres, this residue is predicted to be involved in the dimerization of PpyS by interacting with Asp137 $\alpha$ . The mutation of Arg121 led to a complete loss of photopyrone production. Furthermore Glu330 is shown in cyan spheres, this residue was mutated as a control, which should not influence the photopyrone production as indeed shown in Figure S1.

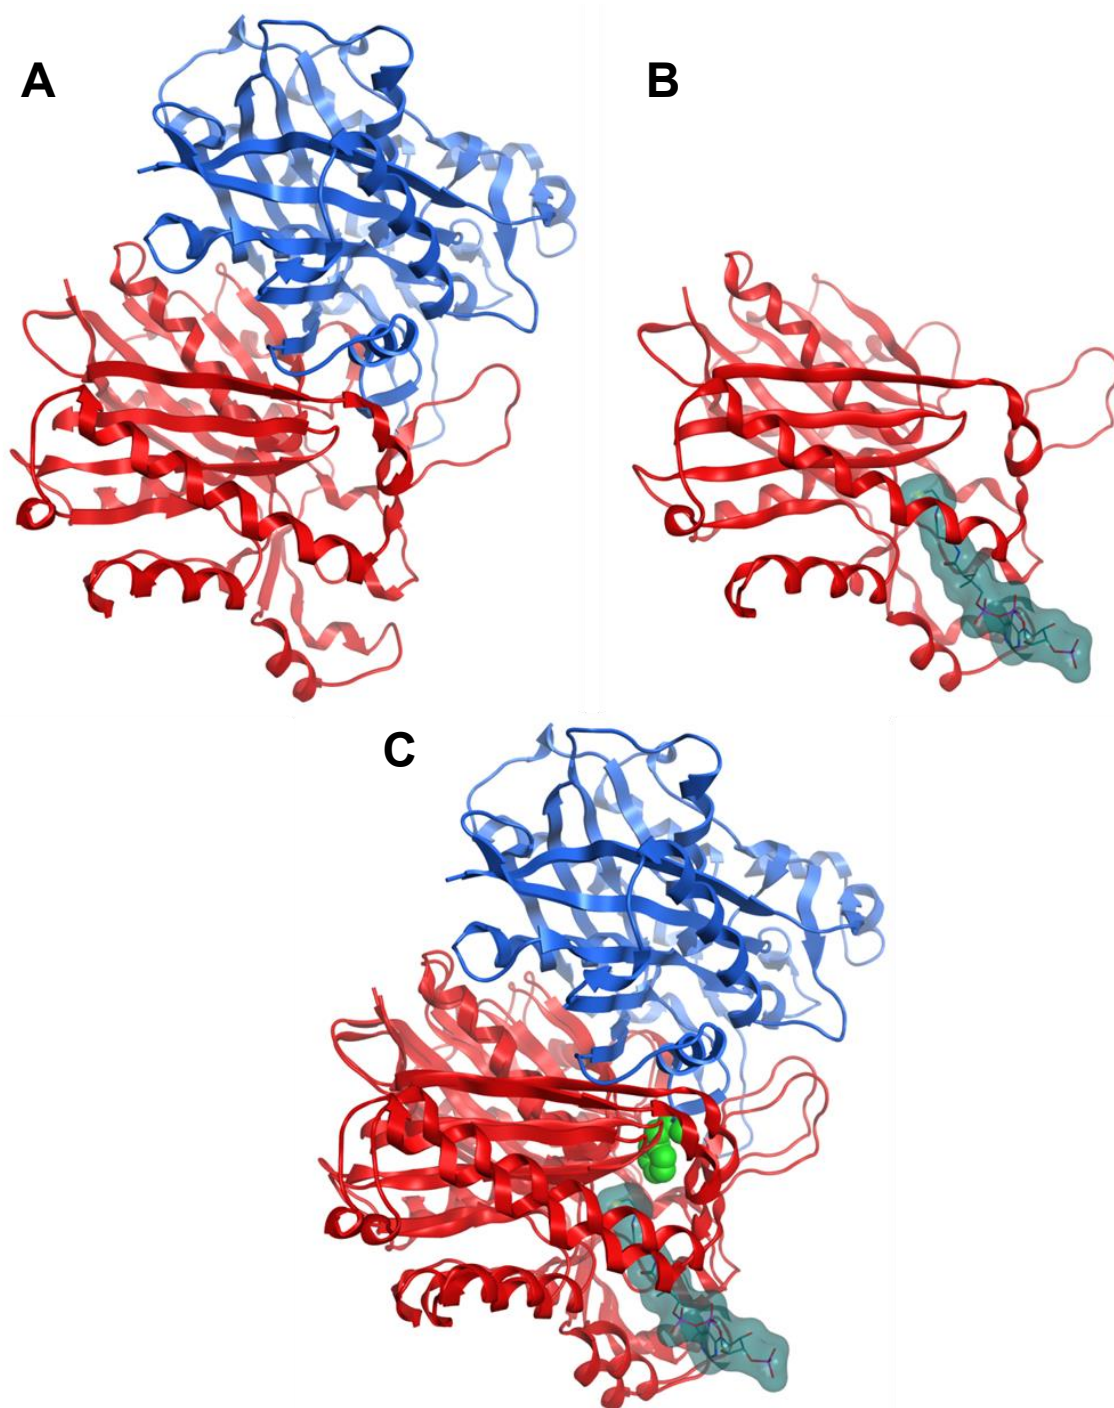

**Figure S4:** Structure of the FabH-dimer (PDB: 1HN9) from *E. coli* (A). Structure of FabH-monomer (PDB: 1HNJ) from *E. coli* along with co-crystallized malonyl-CoA (B). The superposition of both these structures (C) reveals the location of the substrate malonyl-CoA within the dimeric structure and the distance to Phe87 $\beta$ , which is the analogue to Glu105 of PpyS. With a shortest distance of ca. 5.3 Å to the ligand this residue seems not to be directly involved in the catalysis.

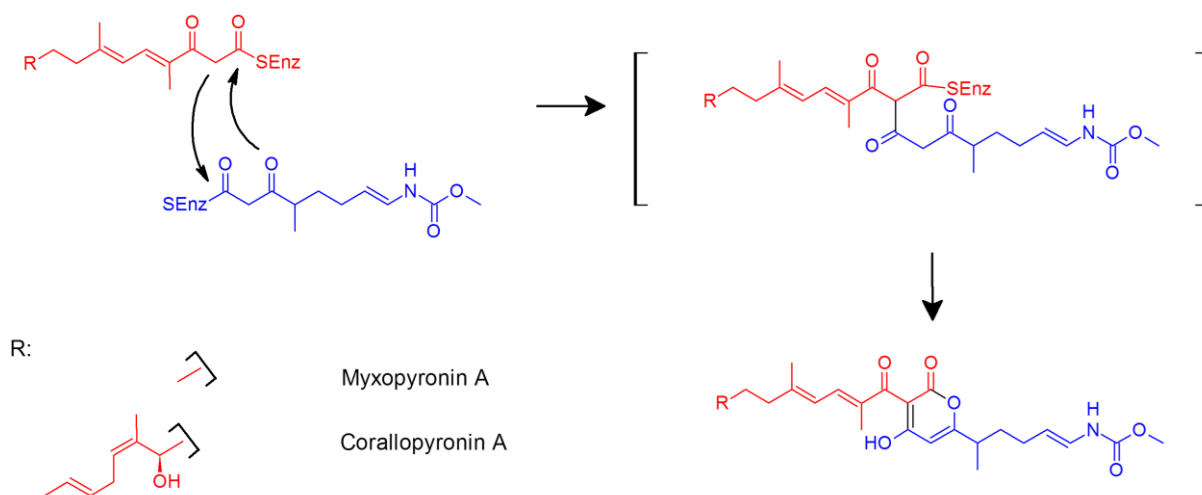

**Figure S5:** Last step of myxopyronin A [15] and corallopyronin A [16] biosynthesis. The western (red) and the east (blue) chains are thought to be condensed by the catalytic activity of the KS MxnB or CorB, respectively. The intermediate shown here follows from the nucleophilic attack of the deprotonated  $\alpha$ -carbon of the western chain with the carbonyl carbon of the eastern chain. Both intermediates were used for docking studies.

```

PpyS  INSRYLADNEKPMELIEAFNHALAQANI IKEDIDLLIYSSVARGFIEPA 107
YP42  LVNRRWCDSHESPIDHVAMATRKALSETYL RPEHIELFIYVGI GRGFLEPG 101
WP16  SDVRYWLDKDEKPIDLVARAFQEAIN EANCDDIDLLVYTG VGRGFIEPA 102
PyrS  SGTRHWLGANETPMELMETAFNSAL AQANIDKADL DLIYPNVTRGFIEPA 102
OleA  IHARRLWDQDVQASDAATQAARKAL IDANIGIEKIGLLINTSVSRDYLEPS 106
FabH  IRE RHIAAPNETVSTMGF EAATRAIEMAGIEKDQIGLIVVATT SATHAFPS 89
CorB  IRE RRWVKD-ETASFMGAEAAKEAVR DAGLKLEDIDLI INASGSPEQAVPD 96
MxnB  IRE RRWVKG-ETA AFMGAEAAKEAVR DAGLQLSDIDLI ISASGSPQQAVPD 96
Cpz6  -VGR RNLTAFADACEMAVDAARRAL AATGLVADDIDAI VTSHTT SWTLPN 114
Gcs   TVQERTAPAW EAVQAYGERAARGAL QIAGLDVADV DCLITSN-STTPALPG 174

PpyS  NSTFVSKALGLT---CRNYDVVDACNGWVAAMD I INSKMKAGEIRHAAIVN 155
YP42  NSHMMASTLGFIN--AECFDVVDACMSWTRAMS I IDSLFKCGQYRNAMIVN 150
WP16  AAYHVAASLGLQN--AECFDI LDACMSWTRVLNIVY SLFKSGRYKRALIVN 151
PyrS  NSTFIAKALGLS---CRNFDVVDACNGWVTAMDV INSKMQAGEIRYAAIVN 150
OleA  TASIVSGNLGVSD-HCMTFDVANACLAF INGM DIAARMLERGEIDYALVVD 156
FabH  AACQIQSMLGIKG--CPAFDVAAACAGFTYALS VADQYVKSGAVKYALVVG 138
CorB  GGPLVQRELGLGRSGVPSITVNASCLSFFV ALDVAANYLNMRRYKRILIVS 147
MxnB  GGPLVQRELGLGRSGTPAITVNASCLSFFVA LEVASNYLNMRRYRRILVVS 147
Cpz6  LDVHLVEVLGLRPDVS RVALTSLACAGGTQALVRAADQLRARP GGKVLVVV 165
Gcs   LDVALANRLPLRGDTMLLPATQWACVAGTRSLAL AADLVAADPDRVVLVVI 225

PpyS  ...IEHIFIHTGSPKTWARLGQKMGID-DKIHHV GQR----VGNIATASIP 317
YP42  ...IDIVFTHASSKAAWHGYGEKVG IQ-DKMYHIYPE----TGNLVSASIP 309
WP16  ...IRAIFPHASSKREWDKVAEALNIK-HLLWHI YPT----YGNLVSASVP 161
PyrS  ...VHKVFIHTGSPKMWEHIGQLIGID-HKLHHV GHK----TGNIITASIP 313
OleA  ...LDQFVIHQVSRPHTAAFVKSFGIDPAKVMT IFGE----HGNI GPASVP 309
FabH  ...LDWLVPHQANLRIISATAKKGMSMDNVV VTLDR----HGNTSAASVP 281
CorB  ...CRYVIPHQPSRVVLDYLS-LTYPD-DKLVRI IDR----FANCIGASMP 299
MxnB  ...VKYIIPHQPSRVVLDYLS-LSYPE-EKLIRI IER----FGNCIGASMP 299
Cpz6  ...PEFAVVHPGGPRIISEVTAALGLDAARTRHSFAS-LEENGLG GNAVL 307
Gcs   ...PDVLLAHPGGTRVLE YMEQTMPDEWPSGLLSYSRDSYTSGNRGGAAVF 377

```

**Figure S6:** A multiple sequence alignment (ClustalW, standard parameters) of PpyS from *P. luminescens* TT01, YP\_004230959 (YP42) from *Burkholderia* sp. CCGE1001, WP\_016949109 (WP16) from *Anabaena* sp. PCC 7108, WP\_007967127 (PyrS) from *Pseudomonas* sp. GM30, OleA from *X. campestris*, FabH from *E. coli*, CorB from *C. coralloides*, MxnB from *M. fulvus*, Cpz6 [17] (caprazamycin biosynthesis) from *Streptomyces* sp. MK730-62F2 and Gcs [18] (germicidin synthase) from *S. coelicolor*. Highly conserved residues are shown in grey, conserved catalytic triad and position of E105 from PpyS are highlighted in black.

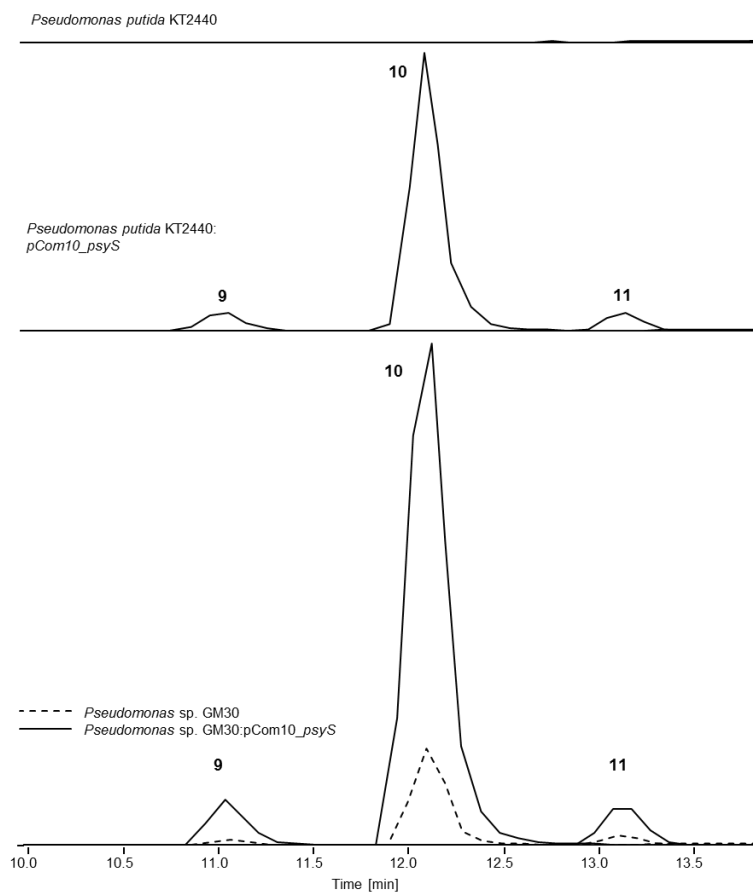

**Figure S7:** Extracted-ion chromatograms (EICs) of pseudopyronines. **9** ( $m/z$  267.2  $[M + H]^+$ ), **10** ( $m/z$  295.2  $[M + H]^+$ ), **11** ( $m/z$  323.2  $[M + H]^+$ ). In *Pseudomonas putida* KT2440 no pseudopyronines could be detected (top chromatogram). All chromatograms are drawn to the same scale.

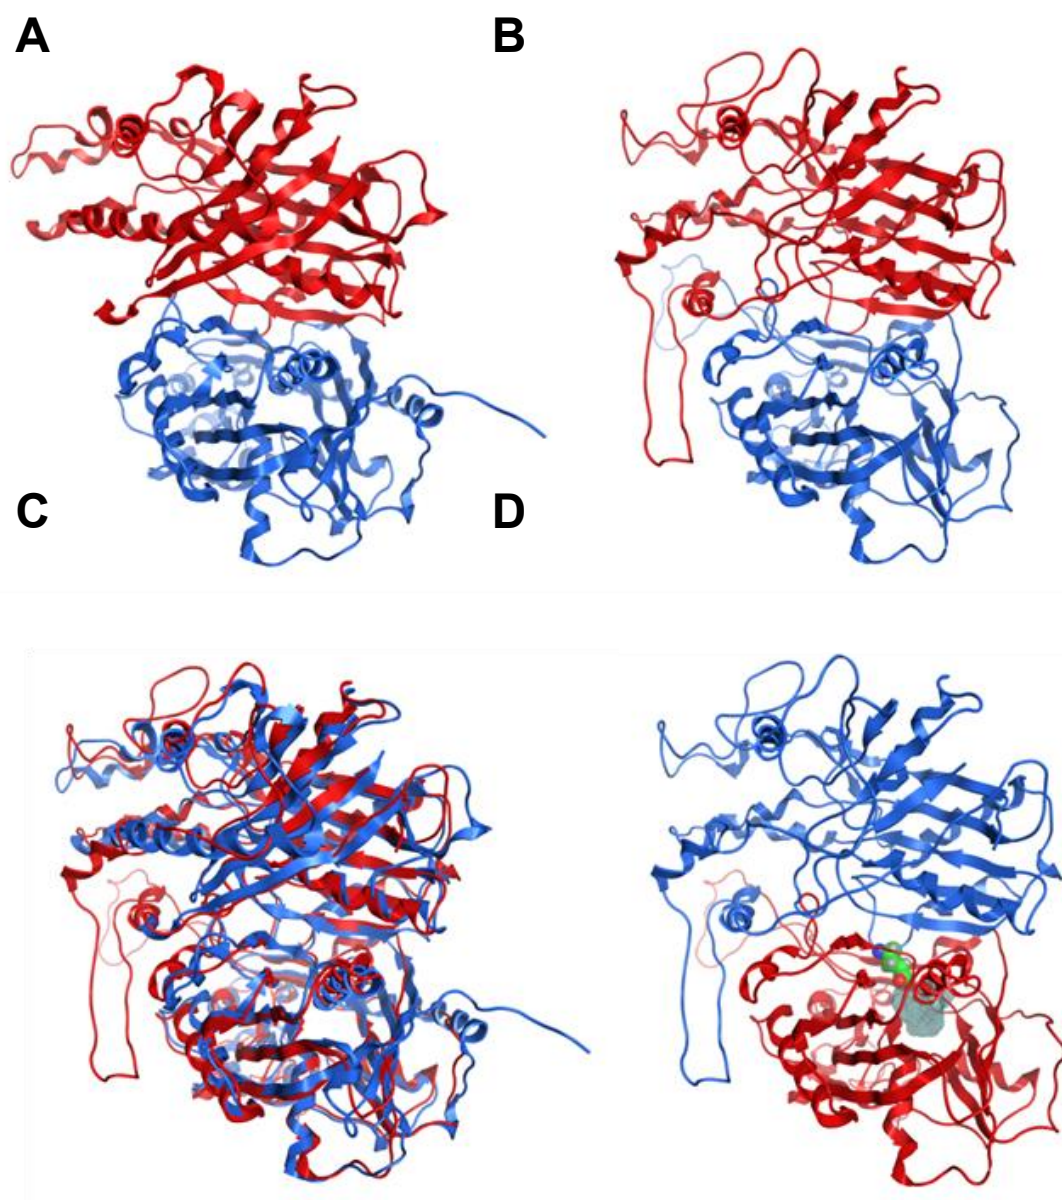

**Figure S8:** Structure of OleA-dimer (PDB: 3ROW) from *Xanthomonas campestris* (A). Modeled structure of pseudopyronine synthase (PyrS)-dimer from *Pseudomonas* sp. GM30 (B), which was generated using the OleA structure as a template. The superposition of OleA (blue) and PyrS (red) structures (C) revealed a root-mean-square deviation (RMSD) of 3.3 Å. The modeled PyrS-dimer structure with covalently to Cys124 docked pseudopyronine B intermediate (**19**, D). In a green sphere representation Glu100 is shown, which is the analogue to Glu105 of PpyS.

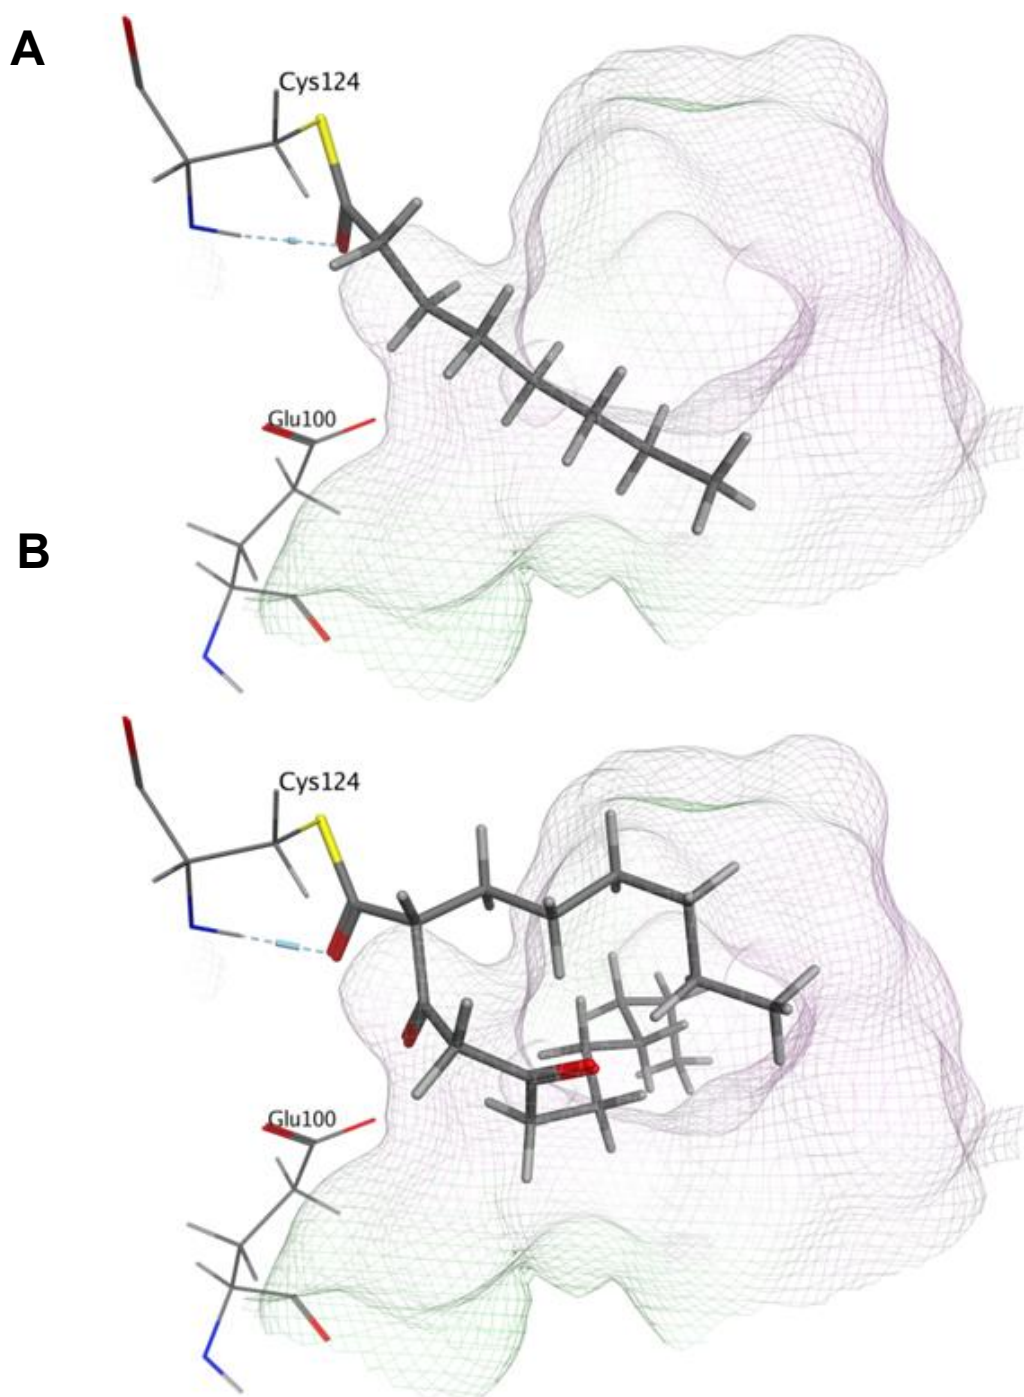

**Figure S9:** A detailed view of the proposed PyrS-binding pocket with covalently to Cys124 docked substrate (**17**, A) and intermediat (**19**, B) of pseudopyronine B. The catalytic triade consists of Cys124, His277 and Asn306. The cavity of the binding pocket is shown in a line representation, where green represents a lipophilic surface area, magenta a hydrophilic and white a neutral. Possible formed hydrogen bonds are shown as dashed blue lines.



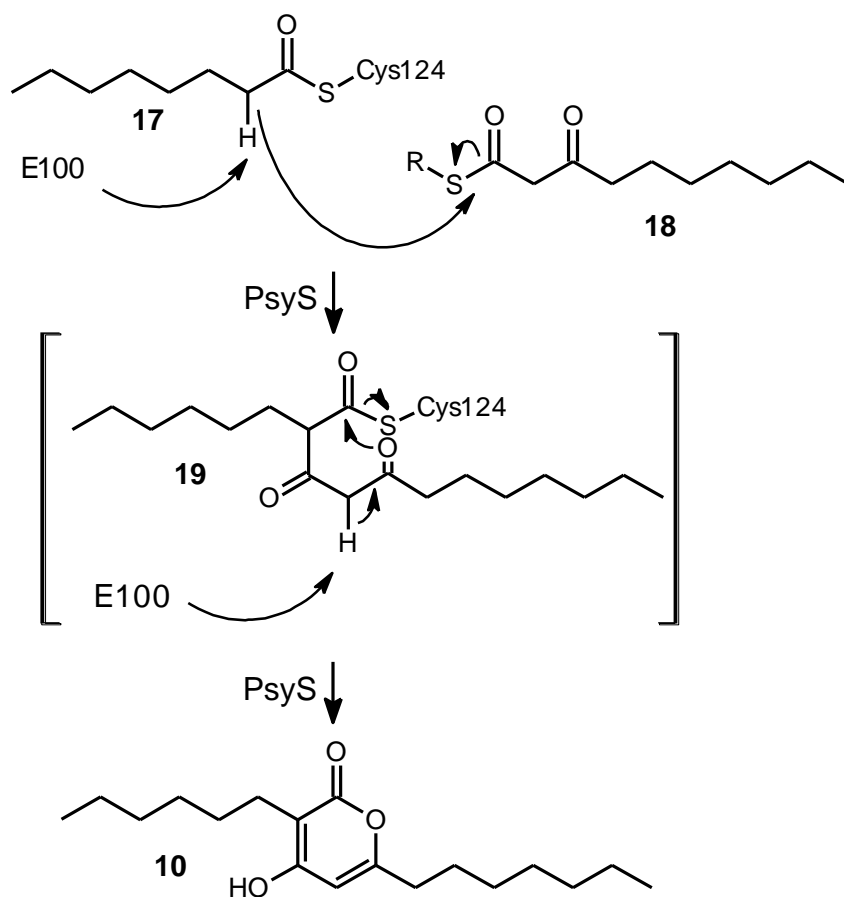

**Scheme S1:** Proposed biosynthesis of **10** by PyrS from *Pseudomonas* sp. GM30. In the first step octanoic acid (**17**) is covalently bound to the active site Cys124. The deprotonated  $\alpha$ -carbon nucleophilically attacks a 3-oxodecanoyl thioester (**18**, R = ACP or CoA) to form the covalently bound intermediate (**19**). Due to a spontaneous or a catalyzed deprotonation (by E100) the pyrone ring is formed and **10** is released from PyrS.

## References

1. Adachi, Y.; Fukuhara, C. *Anal. Biochem.* **2012**, *431*, 66-68.
2. Brachmann, A. O.; Brameyer, S.; Kresovic, D.; Hitkova, I.; Kopp, Y.; Manske, C.; Schubert, K.; Bode, H. B.; Heermann, R. *Nat. Chem. Biol.* **2013**, *9*, 573-578.
3. Gibson, D. G.; Young, L.; Chuang, R.; Venter, J. C.; 3rd, C. A. H.; Smith, H. O. *Nat. Methods* **2009**, *6*, 343-345.
4. Altschul, S. F.; Gish, W.; Miller, W.; Myers, E. W.; Lipman, D. J. *J. Mol. Biol.* **1990**, *215*, 403-410.
5. Berman, H. M.; Westbrook, J.; Feng, Z.; Gilliland, G.; Bhat, T. N.; Weissig, H.; Shindyalov, I. N.; Bourne, P. E. *Nucleic Acids Res.* **2000**, *28*, 235-242.
6. Larkin, M. A.; Blackshields, G.; Brown, N. P.; Chenna, R.; McGettigan, P. A.; McWilliam, H.; Valentin, F.; Wallace, I. M.; Wilm, A.; Lopez, R.; Thompson, J. D.; Gibson, T. J.; Higgins, D. G. *Bioinformatics* **2007**, *23*, 2947-2948.
7. Jones, G.; Willett, P.; Glen, R. C.; Leach, A. R.; Taylor, R. *J. Mol. Biol.* **1997**, *267*, 727-748.
8. Korb, O.; Stützle, T.; Exner, T. E. *J. Chem. Inf. Model.* **2009**, *49*, 84-96
9. Guindon, S.; Gascuel, O. *Syst. Biol.* **2003**, *52*, 696-704
10. Hanahan, D. *J. Mol. Biol.* **1983**, *166*, 557-580.
11. Brown, S. D.; Utturkar, S. M.; Klingeman, D. M.; Johnson, C. M.; Martin, S. L.; Land, M. L.; Lu, T. S.; Schadt, C. W.; Doktycz, M. J.; Pelletier, D. A. *J. Bacteriol.* **2012**, *194*, 5991-5993
12. Nelson, K. E.; Weinel, C.; Paulsen, I. T.; Dodson, R. J.; Hilbert, H.; Santos, dos, V. A. P. M.; Fouts, D. E.; Gill, S. R.; Pop, M.; Holmes, M.; Brinkac, L.; Beanan, M.; DeBoy, R. T.; Daugherty, S.; Kolonay, J.; Madupu, R.; Nelson, W.; White, O.; Peterson, J.; Khouri, H.; Hance, I.; Lee, P. C.; Holtzapple, E.; Scanlan, D.; Tran, K.; Moazzez, A.; Utterback, T.; Rizzo, M.; Lee, K.; Kosack, D.; Moestl, D.; Wedler, H.; Lauber, J.; Stjepandic, D.; Hoheisel, J.; Straetz, M.; Heim, S.; Kiewitz, C.; Eisen, J. A.; Timmis, K. N.; Dusterhöft, A.; Tümmeler, B.; Fraser, C. M. *Environ. Microbiol.* **2002**, *4*, 799-808.
13. Smits, T. H.; Seeger, M. A.; Witholt, B.; van Beilen, J. B. *Plasmid* **2001**, *46*, 16-24.
14. Proschak, A.; Zhou, Q.; Schöner, T.; Thanwisai, A.; Kresovic, D.; Dowling, A.; ffrench-Constant, R.; Proschak, E.; Bode, H. B. *ChemBioChem* **2014**, *15*, 369-372.
15. Sucipto, H.; Wenzel, S. C.; Müller, R. *ChemBioChem* **2013**, *14*, 1581-1589.
16. Erol, O.; Schäberle, T. F.; Schmitz, A.; Rachid, S.; Gurgui, C.; Omari, el, M.; Lohr, F.; Kehraus, S.; Piel, J.; Müller, R.; König, G. M. *ChemBioChem* **2010**, *11*, 1253-1265.
17. Tang, X.; Eitel, K.; Kaysser, L.; Kulik, A.; Grond, S.; Gust, B. *Nat. Chem. Biol.* **2013**, *9*, 610-615.
18. Chemler, J. A.; Buchholz, T. J.; Geders, T. W.; Akey, D. L.; Rath, C. M.; Chlipala, G. E.; Smith, J. L.; Sherman, D. H. *J. Am. Chem. Soc.* **2012**, *134*, 7359-7366.

<sup>1</sup>H-NMR spectrum of pseudopyronine C, DMSO-d<sub>6</sub>

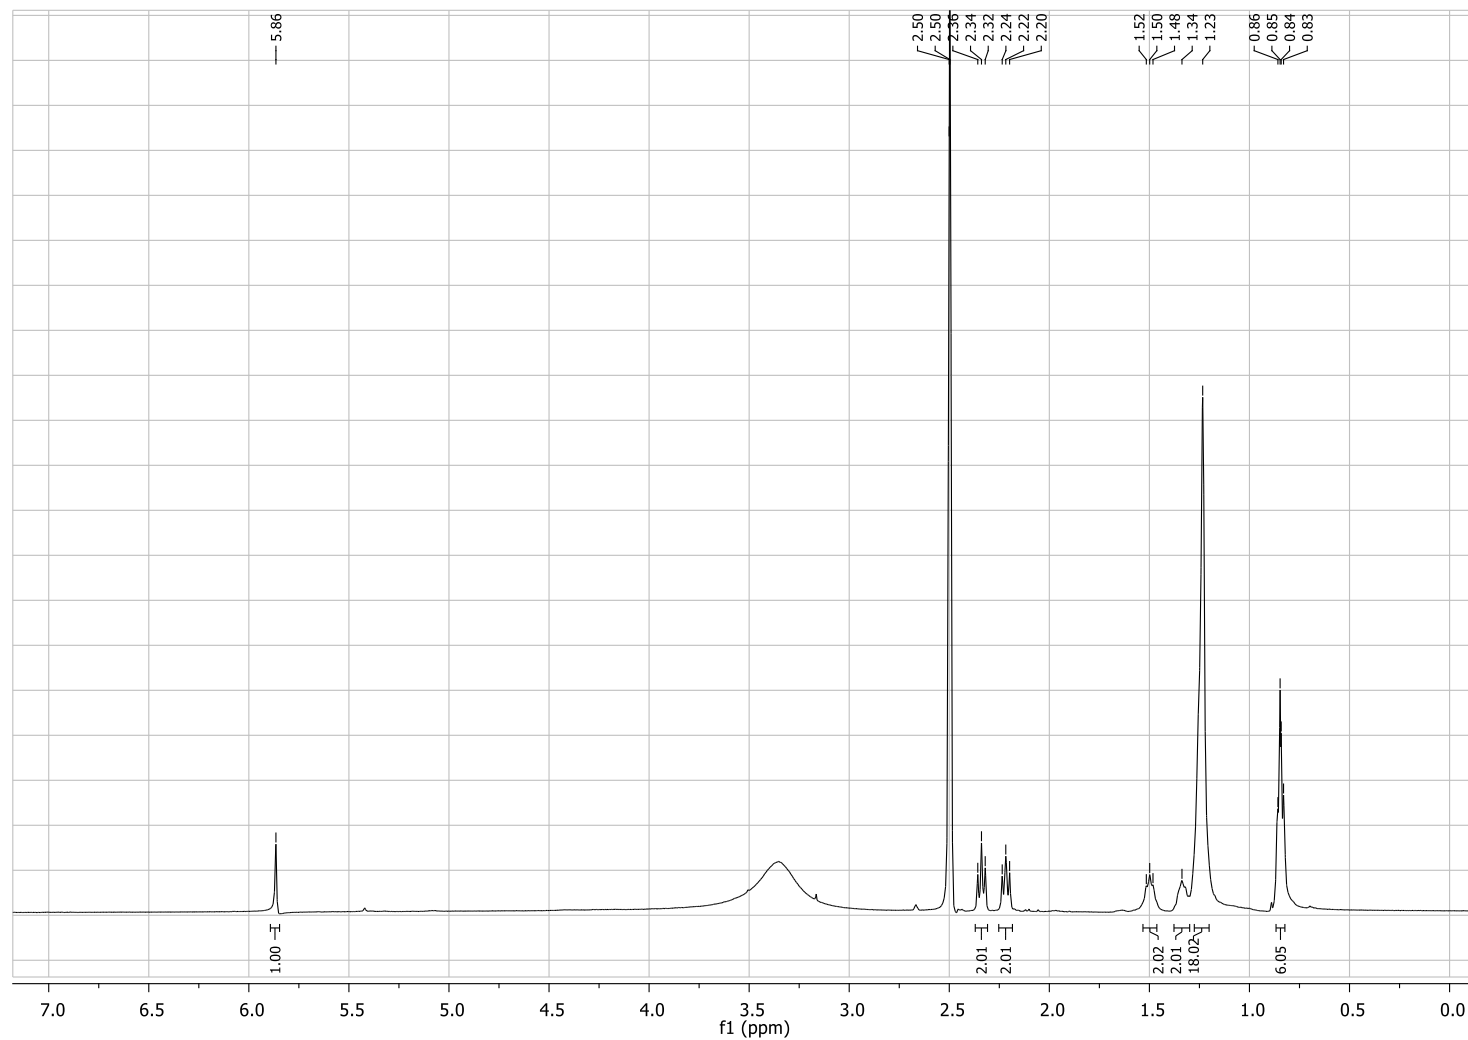

$^{13}\text{C}$  -NMR spectrum of pseudopyronine C, DMSO-*d*6

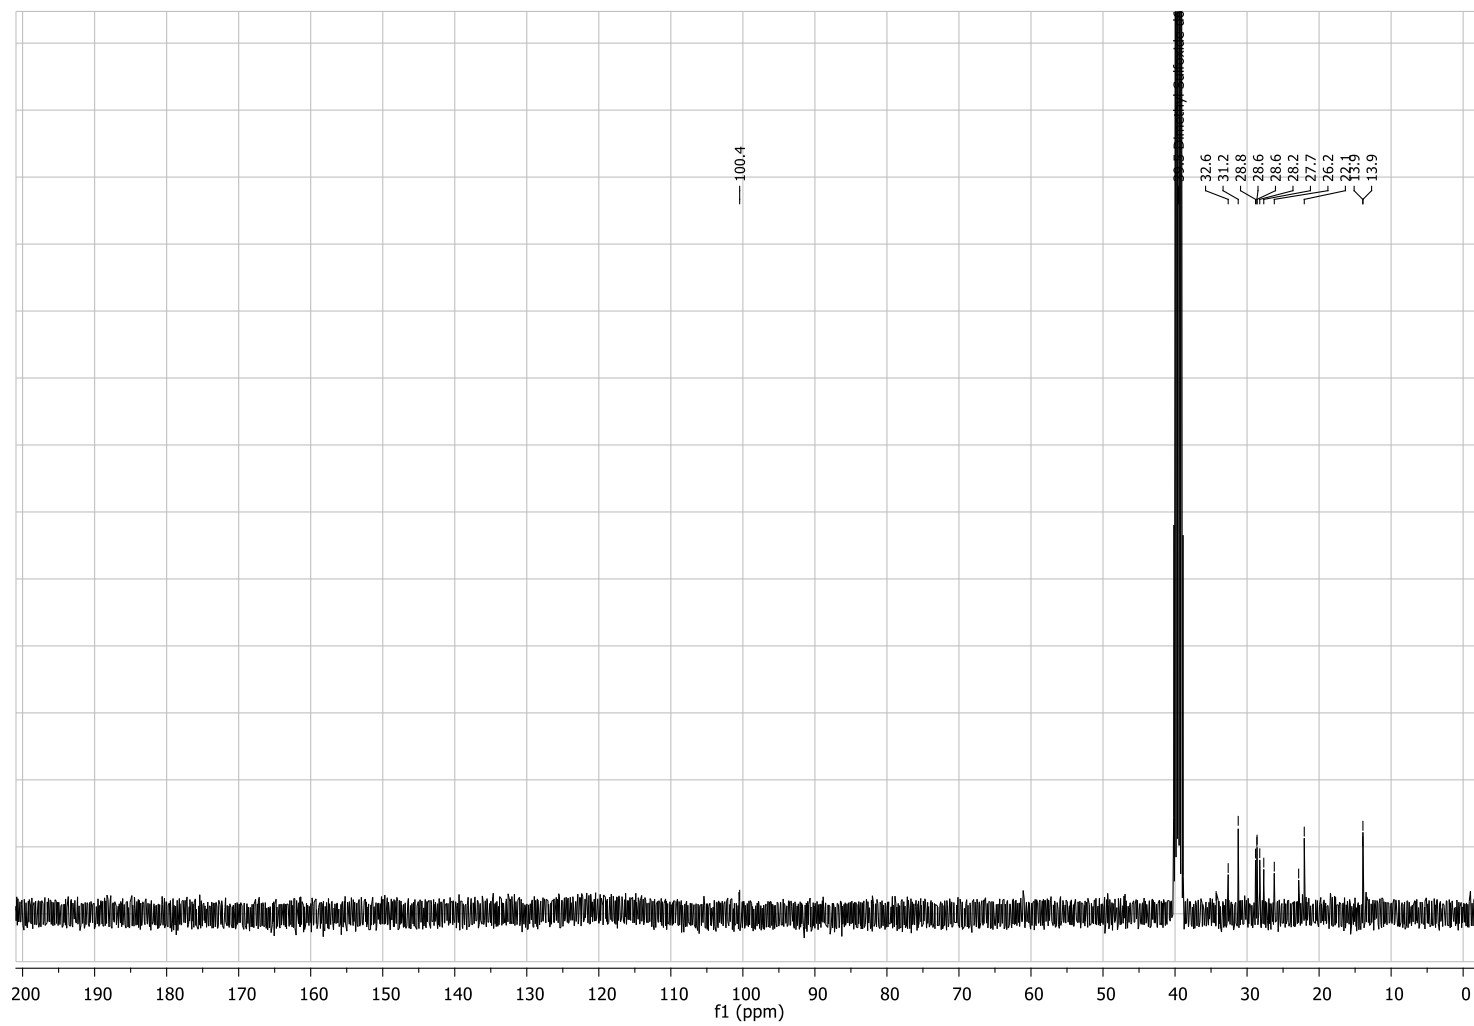

COSY spectrum of pseudopyronine C, DMSO-d6

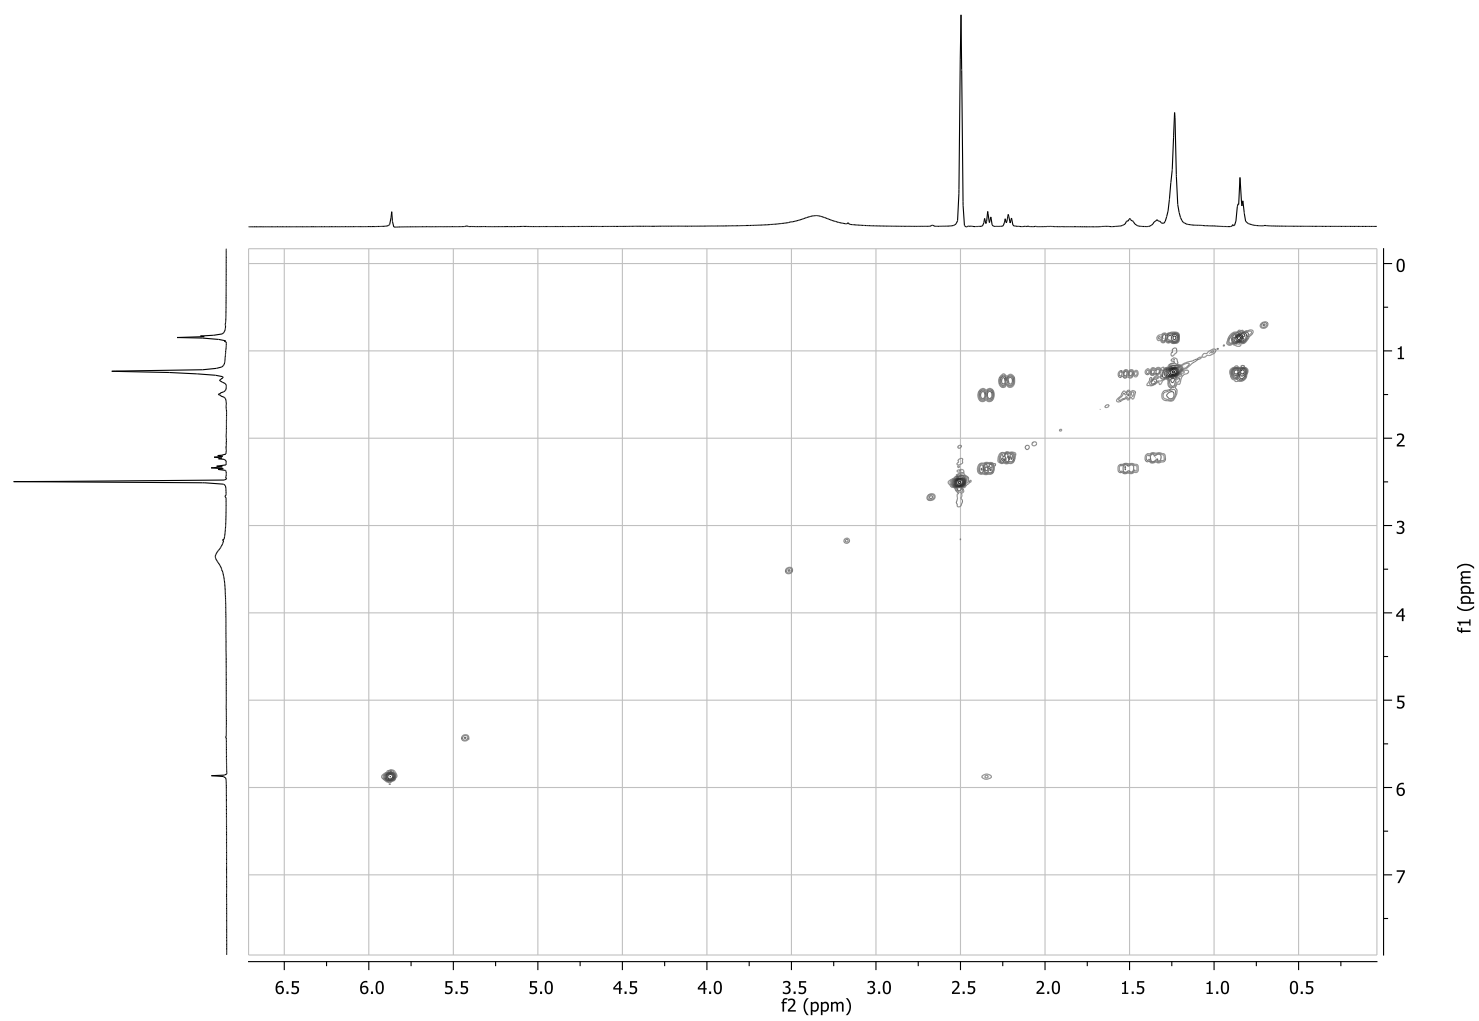

# HSQC spectrum of pseudopyronine C, DMSO-d6

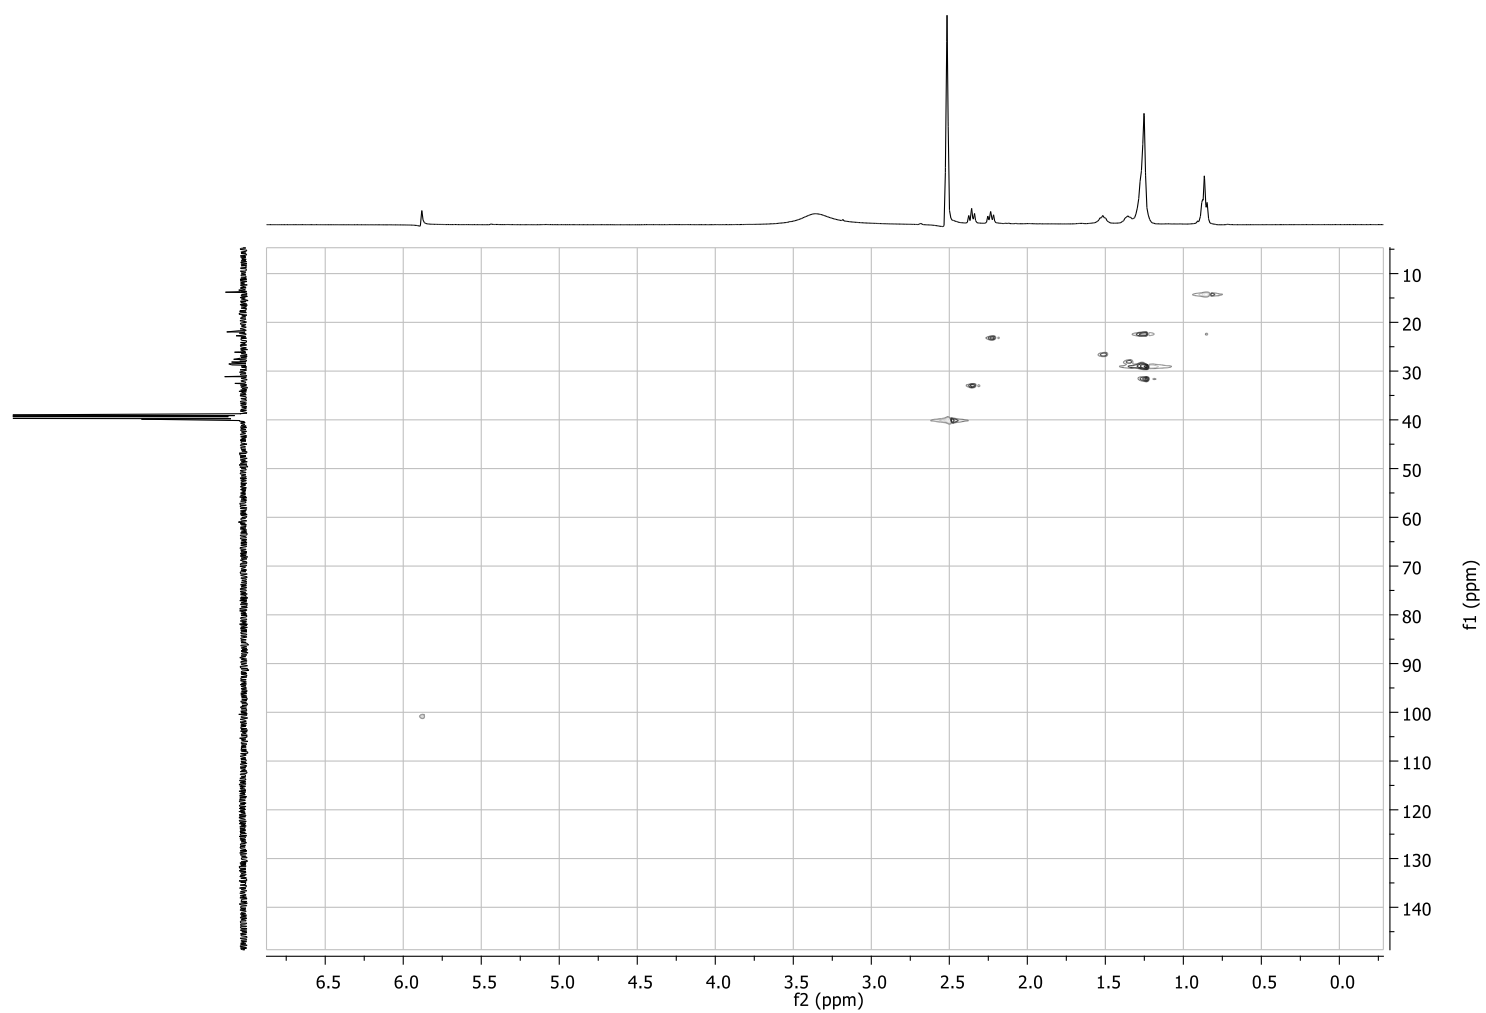

# HMBC spectrum of pseudopyronine C, DMSO-*d*6

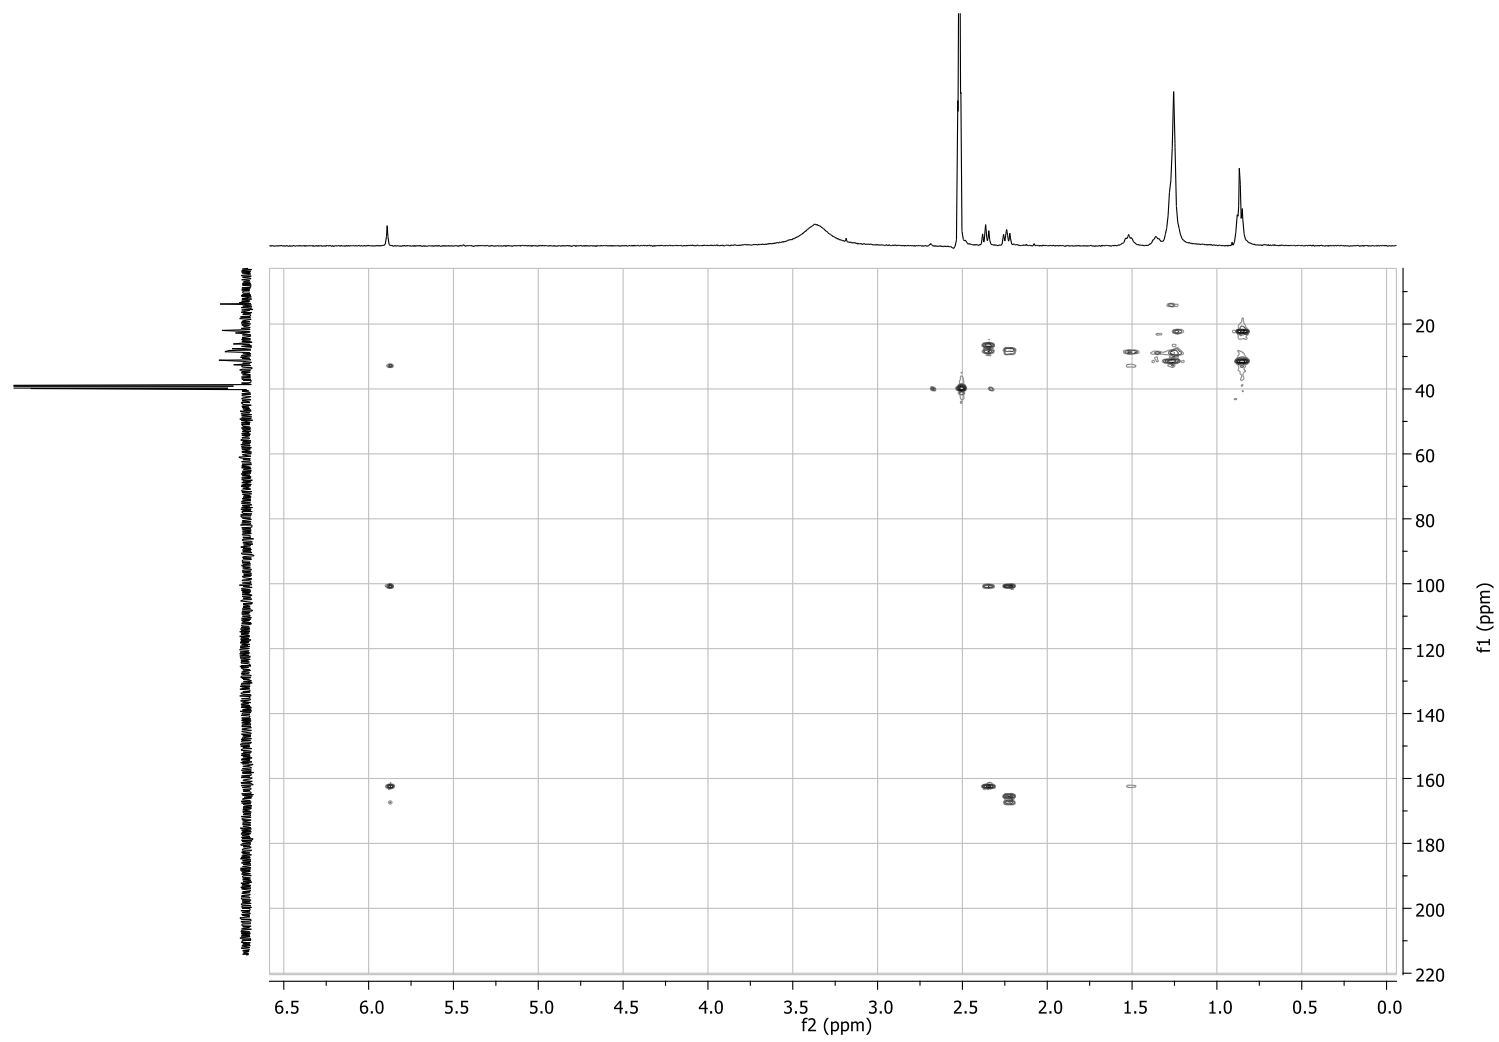

Supplement: Beilstein_J_Org_Chem-11-1412-s001.pdf [file Beilstein_J_Org_Chem-11-1412-s001.pdf]
